# Supplementary material
Source: PubMed Central journal article supplement (PMC5827594)
Supplement: ASN.2017050479SupplementaryData5.pdf [file ASN.2017050479SupplementaryData5.pdf]

## 1 **SUPPLEMENTARY METHODS**

2

### 3 **Antibodies**

4 Monoclonal antibodies used were against transglutaminase 2 (TG2) (IA12,  
5 University of Sheffield, UK; CUB 7402, MA5-12739 Invitrogen, UK),  $\alpha$ -smooth  
6 muscle actin ( $\alpha$ -SMA) [1A4] (ab7817, Abcam, UK) and flotillin-2 (FLOT2) (610383,  
7 BD Transduction Laboratories, UK). Polyclonal antibodies used were against  
8 syndecan-4 (SDC4) (ab24511, Abcam, UK), TG2 (ab421, Abcam, UK), cyclophilin-  
9 A (ab41684, Abcam, UK),  $\beta$ -Tubulin (ab6046, Abcam, UK), hemagglutinin (HA)  
10 (C29F4, Cell Signaling Technology, UK) and GFP (ab290, Abcam, UK).

11

### 12 **Unilateral ureteric obstruction**

13 Experimental unilateral ureteric obstruction (UUO) was performed in TG2-KO and  
14 control (Wild Type, WT) C57BL/6J mice as described by Vielhauer *et al.* (2001).<sup>1</sup>  
15 To perform UUO, mice were anaesthetized with 5% isoflurane and anesthesia  
16 maintained with 2% isoflurane during the surgical process. The left ureter of the  
17 mice was obstructed using a legating clip (Hemoclip Plus, Weck Closure Systems).  
18 ADEPT® [4% (w/v) icodextrin solution] was dispensed in the peritoneum to  
19 prevent post-surgical adhesions prior to closing. The muscle wall was sealed with  
20 continuous stitching and skin wound closed with interrupted stitching using  
21 absorbable sutures. After the procedure, buprenorphine (0.1 mg/kg) was  
22 administered to the mice for pain-relieving. Animal were allowed free access to  
23 standard rodent chow and tap water. Mice were sacrificed and the left kidneys  
24 harvested 21 days post-operation. All experimental procedures were carried out  
25 under license in accordance with regulations laid down by Her Majesty's  
26 Government, UK (Animals Scientific Procedures Act ASPA, 1986), and were

27 approved by the University of Sheffield Animal Ethical Review Committee (ASPA  
28 Ethical Review Process) and Nottingham Trent University Ethical Review  
29 Committee (ASPA Ethical Review Process).

30

### 31 **Fibrosis measurement**

32 Kidneys were fixed in 10% formalin for 15 h at room temperature and washed  
33 with phosphate buffer saline (PBS) pH 7.4 prior to paraffin embedding. Kidney  
34 was then sectioned and stained with Masson's trichrome, which marks collagenous  
35 material blue and nuclei, fibers, erythrocytes and elastin red/pink. Images of  
36 Masson's trichrome stained kidney section were randomly acquired using Olympus  
37 BX61 microscope. Quantification of kidney fibrosis was undertaken using  
38 multiphase image analysis as previously described using Cell F software<sup>2</sup>(Olympus,  
39 Germany).

40

### 41 **Detection of TGF- $\beta$ activity in kidney homogenates by mink lung epithelial 42 cell (MLEC) bioassay**

43 A 10% (w/v) kidney homogenate was prepared in homogenization buffer [0.25 M  
44 sucrose, 10 mM Tris-HCl, 1 mM MgCl<sub>2</sub>, 2 mM EDTA, pH 7.4] containing 1:100 (v/v)  
45 protease inhibitors cocktail (P8340, Sigma, UK). Mechanical homogenization was  
46 performed on ice using an Ultra Turrax T25 homogenizer (Merck, UK). Each  
47 homogenate was centrifuged at 1000 g for 5 min at 4°C to remove large  
48 particulates, then the supernatant diluted 1:10 in sterile-filtered (2  $\mu$ m, Sartorius  
49 Stedim, UK) serum-free DMEM with 0.1% (w/v) BSA. 100  $\mu$ L of this solution was  
50 assayed for the presence of active soluble TGF- $\beta$  by application on the mink lung  
51 epithelial cell line (MLEC) of the TGF- $\beta$  quantification system<sup>3</sup> in a 96-well plate  
52 ( $5 \times 10^4$  cells/well) for 22 h. Cells were then washed twice with PBS and lysed in 1X

53 Reporter Lysis Buffer (Promega, UK). 50  $\mu$ L of cell lysate were mixed to an equal  
54 volume of luciferase substrate (Promega, UK) and light emission measured with  
55 Polarstar Optima luminometer (BMG Labtech, UK). Total TGF- $\beta$  was measured  
56 following acid treatment of the kidney homogenate and incubation with the MLEC  
57 system.<sup>4,5</sup>

58

### 59 **SWATH acquisition mass spectrometry and data analysis of TG2-** 60 **immunoprecipitates**

61 Tryptic peptides from TG2 immunoprecipitates were subjected to reverse-phase  
62 high-pressure liquid chromatography electrospray ionization tandem mass  
63 spectrometry (RP-HPLC-ESI-MS/MS) using a TripleTOF 5600+ mass spectrometer  
64 from SCIEX (Canada). The mass spectrometer was used in two different modalities  
65 depending on the stage of the experiment: data dependent acquisition (DDA)  
66 mode was employed at the beginning for spectral library construction, while  
67 SWATH<sup>®</sup> 2.0 - data independent acquisition (DIA) mode for used for the  
68 quantitation.<sup>6</sup>

69 RP-HPLC mobile phases were solvent A [2% (v/v) LC/MS grade acetonitrile,  
70 5% (v/v) DMSO and 0.1% (v/v) formic acid in LC/MS grade water] and solvent B  
71 [LC/MS grade acetonitrile containing 5% (v/v) DMSO and 0.1% (v/v) formic acid].  
72 Samples were injected with an Eksigent nanoLC 425 system using NanoHiPLC  
73 columns (Eksigent, USA) with trap and elute system (200  $\mu$ m  $\times$  0.5 mm trap  
74 column and 75  $\mu$ m  $\times$  15 cm analytical column packed with 3  $\mu$ m ChromSP C-18  
75 media - 300  $\text{\AA}$ ). Samples were loaded onto the trap column at 5  $\mu$ L/min for 3 min  
76 in 100% solvent A, then were eluted from the analytical column at a flow rate of  
77 300 nL/min using an increasing linear gradient of solvent B over solvent A, going  
78 from 5% to 35% in a total time of 60 min (SWATH-DIA) or 120 min (Spectral

79 library production by DDA). Regeneration and re-equilibration of the column were  
80 performed by loading 90% solvent B for 10 min followed by 5% solvent B for 10  
81 min. Autocalibration was performed by the MS every four samples using an  
82 injection of a standard of 25 pmol  $\beta$ -galactosidase digest. The electrospray  
83 ionization was carried out using PicoTIP nanospray emitters uncoated SilicaTips  
84 (New Objective, USA) with voltage set to +2400 V.

85 A spectral library was produced by DDA on a pool of all samples, in high  
86 sensitivity mode. DDA mass spectrometry files were searched using ProteinPilot 4  
87 (SCIEX) and the analysis was conducted by the software with an exhaustive  
88 identification strategy, searching the UniProt/Swiss-Prot database (January 2014  
89 release) for murine species. The generated file was imported into PeakView 2.0  
90 software (SCIEX) as an ion library and spiked in iRT retention time standards  
91 (Biognosys, Switzerland), after filtering for false discovery rate (FDR) of 1% and  
92 excluding shared peptides.

93 Five TG2-IP samples per treatment were subjected to cyclic DIA using static  
94 SWATH windows of  $m/z = 15$ . Thirty-four static SWATH windows from 400 to 900  
95  $m/z$  were used with an accumulation time of 96 ms, giving a cycle time of 3.3 s.  
96 During different cycles, the initial survey scan (TOF-MS) was performed for each  
97 window, and subsequently the MS/MS experiments was carried out on the totality  
98 of the precursors detected in the SWATH window using rolling collision energy.<sup>6</sup>

99 Spectral alignment and targeted data extraction was performed in PeakView  
100 2.0 using the reference spectral library generated by DDA in a pool of TG2-IP  
101 samples. SWATH data was processed using an extraction window of 12 min and  
102 applying these parameters: 100 peptides, 5 transitions, peptide confidence > 99%,  
103 exclusion of shared peptides, and XIC width set at 50 ppm. The output consisted  
104 of three different quantification files representing the intensity of the individual

105 transitions (the area under the intensity curve), of the different peptides  
106 (cumulative peak area of the transitions) and of the proteins (cumulative peak  
107 area of the peptides). To identify the proteins significantly associated to TG2, a z-  
108 test statistical analysis was performed on the normalized protein peak areas (as  
109 outlined in the next section), using the TG2-KO data as background.

110

### 111 **Z-test statistical analysis**

112 The significance of protein association with TG2 was determined by z-test analysis<sup>7</sup>  
113 of the five independent SWATH data acquisition mass spectrometry experiments  
114 performed on TG2-IP, using the TG2-null mice as background control. First, the  
115 protein peak area of every detected protein was normalized within the whole  
116 experiment using a Z-transformation: each intensity value was transformed using  
117 the natural log transformation and then normalized by subtracting the average of  
118 the entire population ( $\mu$ ) and dividing for the standard deviation of the entire  
119 population ( $\sigma$ ), as shown in the equation (1) below.  $\Delta Z$  values were then calculated  
120 by subtracting TG2-KO Z-score from WT Z-score for each protein in the same  
121 treatment (sham or UUO) (equation 2). Finally, the z-test (equation 3a) was  
122 performed on the five experiments together, to compare WT and TG2-KO data in  
123 the same treatment: the average of the  $\Delta Z$  for the protein in the different  
124 experiments was divided by the standard error of the  $\Delta Z$  in the different  
125 experiments (equation 3b). Results were then plotted on a normal distribution  
126 curve to obtain probability values (p-values). Proteins with p-value lower than  
127 0.05 detected in at least 4 out of 5 experiments ( $n \geq 4$ ) were regarded as  
128 significantly associated with TG2, meaning that the protein can be considered a  
129 specific partner (directly or indirectly associated) for the enzyme.

130

131 (1)  $Z \text{ score} = Z_i = \frac{X_i - \mu}{\sigma}$

132 (2)  $\Delta Z_i = Z_{WT,i} - Z_{KO,i}$

133 (3a)  $Z_{test_i} = \frac{X_i - H_0}{SE}$

134 Since  $H_0: \Delta Z = 0 \rightarrow Z_{WT} - Z_{KO} = 0$  (no differences between WT and TG2-KO)

135 (3b)  $Z_{test_i} = \frac{\Delta Z_i}{\frac{SD_i}{\sqrt{N}}}$

136

137 **SWATH acquisition mass spectrometry and data analysis of kidney**  
138 **proteomes**

139 Kidney lysates were analyzed by RP-HPLC-ESI-MS/MS using a TripleTOF 5600+  
140 mass spectrometer as outlined before, with some modification in the protocol.  
141 Samples were directly injected onto an YMC Triart-C18 column (25 cm, 2  $\mu$ m, 300  
142  $\mu$ m i.d) at 5  $\mu$ L/min using microflow LC system (Eksigent ekspert nano LC 425)  
143 and an increasing linear gradient of solvent B over solvent A going from 2% to  
144 40% in a total time of 60 min (SWATH-DIA) or 120 min (spectral library production  
145 by DDA). A spectral library was produced by DDA on a pool of all samples in high  
146 sensitivity mode and DDA mass spectrometry files were searched using  
147 ProteinPilot 5 (SCIEX). The analysis was conducted by the software with an  
148 exhaustive identification strategy, searching the UniProt/Swiss-Prot database  
149 (March 2016 release) for murine species. The generated file was imported into  
150 PeakView 2.0 software (SCIEX) and spiked in iRT as outlined before.

151 SWATH-DIA was executed on four kidney lysates per treatment (WT or TG2-  
152 KO, UUO or sham operated). DIA was performed using 40 variable SWATH  
153 windows. Spectral alignment and targeted data extraction from the SWATH data  
154 was performed in OneOmics (SCIEX) using the reference spectral library produced

155 by DDA. SWATH data were processed using an extraction window of 5 min and  
156 applying the following parameters: 6 peptides/protein, 6 transitions, peptide  
157 confidence of >99%, exclude shared peptides, and XIC width set at 75 ppm.  
158 Analysis of the differentially expressed proteins between the different treatments  
159 were carried out using SCIEX OneOmics cloud processing software, as the ratio of  
160 protein peak area in UUO kidney lysates over the protein peak area of the same  
161 protein in sham operated condition [ $\log_2(\text{UUO}/\text{Sham})$ ]. Data were regarded as  
162 differentially expressed at 0.8 (80%) confidence level.

163

### 164 **Bioinformatic Analysis**

165 Proteins were clustered in categories depending on their known main biological  
166 function. This was performed by manual search of the protein IDs into the UniProt  
167 Knowledgebase (UniProtKB) ([www.uniprot.org](http://www.uniprot.org)<sup>8</sup>; UniProt Consortium, 2015) and  
168 GeneCards® database ([www.genecards.org](http://www.genecards.org)<sup>9</sup>). Functional classification and  
169 pathway analysis was performed using two different open source bioinformatics  
170 resources: DAVID (Database for Annotation, Visualization, and Integrated  
171 Discovery) bioinformatics resource 6.7 (<http://david.abcc.ncifcrf.gov>)<sup>10</sup> and  
172 PANTHER (Protein ANalysis THrough Evolutionary Relationships) database  
173 ([www.pantherdb.org](http://www.pantherdb.org)).<sup>11</sup> In both cases, the whole *Mus musculus* genome was  
174 employed as background list. Functional enrichment analysis was performed in  
175 PANTHER using PANTHER protein class terms. Pathway overrepresentation  
176 analysis was performed using DAVID bioinformatics resource by comparing the  
177 representation of the different Kyoto Encyclopedia of Genes and Genomes (KEGG,  
178 [www.genome.jp/kegg](http://www.genome.jp/kegg)) terms (KEGG\_PATHWAY) to the expected pathway  
179 representation in *Mus musculus*.

180 In order to identify clusters and networks of interacting proteins, known  
181 and predicted protein-protein interactions were investigated using STRING  
182 (Search Tool for the Retrieval of INteracting Genes/proteins) database v10  
183 (<http://string-db.org>).<sup>12</sup> The network was produced by using confidence level  
184 higher than the default 0.4 and by removing all the unconnected proteins and the  
185 small unconnected networks. The network was exported and analyzed using the  
186 open source software Cytoscape v. 3.0.2 ([www.cytoscape.org](http://www.cytoscape.org)), to visualize the  
187 protein clusters and assign specific colors to the nodes corresponding to the  
188 different functional clusters.

189

### 190 **Isolation and characterization of extracellular vesicles from cell medium**

191 To extract extracellular vesicles (EVs) from cell medium, cells were cultured until  
192 80% confluent. At this stage, cell monolayers were washed twice with PBS to  
193 remove every fetal bovine serum (FBS) trace, the medium was replaced with  
194 serum-free DMEM containing L-glutamine and penicillin/streptomycin, and cells  
195 were cultured for additional 36 h.

196 After incubation, medium was collected and supplemented with protease  
197 inhibitors (Roche, UK). Cells were washed with PBS, scraped in PBS, and the pellet  
198 collected by centrifugation at 500 g for 5 min. Medium was centrifuged three times  
199 at 300 g for 10 min at 4°C to remove remaining cells, and supernatant (S1) was  
200 centrifuged at 1,200 g for 20 min at 4°C to remove large cell debris and apoptotic  
201 bodies (P2). Supernatant (S2) was centrifuged 10,000 g for 30 min at 4°C in order  
202 to collect the microvesicular (ectosomal) portion (P3), which supernatant (S3) was  
203 centrifuged at 110,000 g for 1 h at 4°C in order to collect the exosomes (P4)<sup>13,14</sup>.  
204 All pellets were collected and resuspended in 40 µL of the suitable buffer. After  
205 the last centrifugation, cleared medium (S4) was collected and proteins were



206 precipitated using trichloroacetic acid (TCA), as follows: 0.1 volume of TCA was  
207 added to the medium and incubated for 1 h on ice. The mixture was centrifuged  
208 for 5 min at 13,000 rpm, then pellet was washed with cold 100% acetone and  
209 centrifuged again for 5 min 13,000 rpm. Pellet (EV-free medium proteins and  
210 complexes) was air-dried and resuspended in 40  $\mu$ L of the suitable buffer.

211 For EV analysis by tunable resistive pulse sensing (TRPS) (qNano, Izon),  
212 Nanopore NP150 (Izon) and calibration particles (1:1, 200 nm, Izon) were used  
213 to analyze exosomes while Nanopore NP300 (Izon) and calibration particles (1:1,  
214 200nm) were used for ectosome analysis. Samples were measured at three  
215 pressure levels. The sizes and concentrations of particles were determined using  
216 the software provided by Izon (version 3.2).

217

### 218 **Isolation of primary cells from WT and SDC4-null mice**

219 Kidney glomeruli and tubules were isolated from wild type and SDC4<sup>-/-</sup> mice  
220 C57BL/6J mice using the method described by Fisher et al. <sup>15</sup> The kidney was  
221 perfused in situ with Dynabeads<sup>®</sup> which become wedged in the glomeruli. The  
222 cortex was isolated, disrupted and passed through sieves with the filtrate  
223 consisting of cortical tubular fragments and some glomeruli. Any glomeruli were  
224 removed and set aside by use of a strontium magnet. The remaining tubular  
225 fragments were plated in tissue culture dishes containing medium with low serum  
226 and growth supplements to stimulate epithelial cell proliferation. The primary  
227 tubular epithelial cells (TECs) grew out from tubules in the following medium:  
228 DMEM/F12, containing 0.5% heat-inactivated FBS (v/v), 100 U/mL penicillin, 100  
229  $\mu$ g/mL streptomycin, 22 mM L-glutamine, and supplemented with 10  $\mu$ g/mL  
230 insulin, 5.5  $\mu$ g/mL transferrin, 5 ng/mL sodium selenite (ITS supplement, Sigma,  
231 UK), 10 ng/mL epidermal growth factor (R&D Systems, UK), 5 pg/mL tri-

232 iodothyramine, 5 µg/mL dexamethasone, 12.5 µg/mL each of adenosine, cytosine,  
233 guanosine, uridine and 2.5 µg/mL amphotericin B. Primary fibroblasts grew out  
234 from tubules in Dulbecco's modified Eagle's medium:nutrient mixture F12  
235 (DMEM/F12), containing 10% (v/v) heat-inactivated FBS (Biosera, UK), 100  
236 IU/mL penicillin, 100 µg/mL streptomycin and 0.25 µg/mL amphotericin-B;  
237 Primary mesangial cells grew out from glomeruli in Roswell Park Memorial Institute  
238 (RPMI) 1640 medium containing 20% (v/v) heat-inactivated FBS, 2.2 mM L-  
239 glutamine, 1 mM sodium pyruvate, 0.075% (w/v) sodium bicarbonate, 15 mM  
240 HEPES, 100 IU/mL penicillin, 100 µg/mL streptomycin and 0.25 µg/mL  
241 amphotericin-B. All media were from Invitrogen, and the supplements from Sigma,  
242 unless otherwise stated.

243

#### 244 **Western blotting**

245 10% (w/v) kidney homogenates were prepared in homogenization buffer [0.25 M  
246 sucrose, 10 mM Tris-HCl, 1 mM MgCl<sub>2</sub>, 2 mM EDTA, pH 7.4] containing 1:100 (v/v)  
247 protease inhibitors cocktail (Sigma, UK). Mechanical homogenization was  
248 performed on ice, using an Ultra Turrax T25 homogenizer (Merck, UK). Cell lysates  
249 and EV lysates were prepared in in radiomunoprecipitation assay (RIPA) buffer  
250 [50 mM TRIS HCl pH 8, 150 mM NaCl, 1% (v/v) NP40 detergent solution, 0.5%  
251 (w/v) sodium deoxycholate, 0.1% (w/v) SDS] containing EDTA-free protease  
252 inhibitors (Roche, UK). Unless differently stated, equal amounts of proteins were  
253 resolved by SDS-PAGE [8% to 12% (w/v) acrylamide] under reducing and  
254 denaturing conditions. Immunodetection of the proteins of interest was performed  
255 by Western blot. After initial optimizations, typically the blot was cut horizontally  
256 and probed with different antibodies to minimize stripping and re-probing.  
257 Immunoreactive bands were detected by enhanced chemiluminescence (EZ-

258 chemiluminescence detection kit for HRP, Geneflow) after incubation with  
259 appropriate HRP-conjugated secondary antibody. Secondary antibodies were  
260 obtained from Dako (Denmark). Image acquisition was performed with a LAS4000  
261 imaging system (GE Healthcare, UK).

262

### 263 **Extracellular vesicle isolation form urine samples**

264 Clinical cell-free urine samples from CKD patients characterized by stage 3 and 4  
265 CKD (GFR loss higher than 4 mL/min per year; n=10) and controls (n=5) were  
266 obtained by informed consent for a study approved by the Research Ethics  
267 Committee of Sheffield University. EVs were isolated from 12 mL pools of cell-free  
268 urine following a protocol similar to that employed to isolate EVs from cell culture  
269 medium, with adaptations described by Sequeiros et al., 2017.<sup>16</sup> P3 (ectosomes)  
270 and P4 (exosome) pellets and the TCA-precipitated EV-free urine fraction (S4)  
271 were homogenized in RIPA buffer, proteins quantified (BCA assay) and equal  
272 amounts analyzed in reducing and denaturing conditions by Western blotting. All  
273 precautions to lower interference from DTT and urea were taken in the protein  
274 assay.

275

276 **SUPPLEMENTARY FIGURES**

277

278 **Supplementary Figure 1. Specific TG2 partner proteins belonging to the**  
279 **nuclear membrane compartment (A) or with mitochondrial/peroxisomal**  
280 **membrane location (B).** TG2 associated proteins in UUO or sham operated  
281 kidney membranes were defined by z-analysis ( $p \leq 0.05$ ,  $n \geq 4$ ) of  $n=5$  independent  
282 experiments which combined TG2-IP and SWATH-MS, using the TG2-null mice as  
283 background control, as described in legend to Table 1. Membrane proteins  
284 previously reported to be exclusively located in nucleus (A) and in the  
285 mitochondrial or peroxisomal compartments (B) were manually selected from the  
286 SWATH-MS dataset according to the subcellular localization database  
287 "COMPARTMENTS" and UniProtKB. The presented histograms list proteins in order  
288 of significance of their association to TG2 ( $\text{Log}_{10}$  p-value) in UUO (red color  
289 histogram bars) and sham controls (grey color histogram bars).

290

291 **Supplementary Figure 2. TG2 associated proteins in UUO-Enriched KEGG**  
292 **pathways likely to be involved in kidney fibrosis.** Example of KEGG pathways  
293 ([www.genome.jp/kegg/](http://www.genome.jp/kegg/)) overrepresented in the UUO kidney compared to sham  
294 operated kidney (with reference to Suppl. Table 4B). ECM-receptor interaction (A),  
295 regulation of the actin cytoskeleton (B). Red stars denote proteins significantly  
296 increased in the UUO kidney compared to the sham operated conditions  
297 (confidence > 80%). Blue stars denote proteins found to be significantly  
298 associated with TG2 ( $p \leq 0.05$ ) in the UUO kidney membrane fraction.

299

300 **Supplementary Figure 3. TG2 in extracellular vesicle fractions of NRK49F**  
301 **fibroblasts.** NRK49F cells were grown in serum-free medium for 36 h without and

302 with supplementation of 10 ng/mL TGF- $\beta$ 1. After incubation, culture medium was  
303 collected and vesicular fraction separated by serial centrifugation as described in  
304 the Methods. All fractions were immunoprobed for TG2 and flotillin-2 (FLOT2).

305

306 **Supplementary Figure 4. TG2 in extracellular vesicle fractions from urine.**

307 Ectosomal (P3) and exosomal (P4) fractions were isolated by serial centrifugation  
308 from pools of cell-free urine from healthy and CKD patients (stages 3-4), as  
309 described in the Suppl. methods. Proteins from EV-free urine (S4) were  
310 concentrated by TCA precipitation. Equal amounts of EV fractions and EV-free  
311 urine were immunoprobed with primary antibodies towards TG2 (mouse  
312 monoclonal CUB 7402) and FLOT2.

313

314 **SUPPLEMENTARY TABLES**

315

316 **Supplementary Table 1. Ribosomal proteins (A and B) and**  
317 **immunoglobulins (C) associated with TG2 in the UUO and sham kidney**  
318 **membranes.** The association was evaluated as described in legend to Table 1.

319 Proteins are denoted by full gene name and ID, and listed according to specificity  
320 of the interaction with TG2. U, TG2-associated proteins uniquely found in UUO  
321 membranes; S, TG2-associated proteins uniquely found in Sham operated  
322 membranes; U/S, TG2-associated proteins in UUO and sham control membranes.

323

324 **Supplementary Table 2. UUO versus sham kidney proteome – proteins**  
325 **increasing upon UUO (UUO/sham > 1).** The UUO and sham operated kidney

326 proteome was resolved by SWATH acquisition MS as described in the Methods.

327 Proteins significantly increased in UUO kidneys at confidence  $\geq$  80% are listed

328 according to UUO/Sham ratio as calculated by SCIEX OneOmics cloud processing  
329 software. The absolute protein peak area variation ( $2^{\text{Abs} [\log_2(\text{UUO/Sham})]}$ ) is here  
330 shown. Red cells represent a higher signal in UUO compared to sham, and proteins  
331 are sorted by descending values. Yellow represent the confidence; a confidence  $\geq$   
332 80% was regarded as significant.

333

334 **Supplementary Table 3. UUO versus sham kidney proteome – proteins**  
335 **decreasing upon UUO (UUO/sham < 1).** The UUO and sham kidney proteome  
336 was resolved and UUO/Sham ratio expressed as described in legend to Suppl.  
337 Table 2. The absolute peak area variation ( $2^{\text{Abs} [\log_2(\text{UUO/Sham})]}$ ) is here shown. Green  
338 cells represent a lower signal in UUO compared to sham operated kidneys and  
339 proteins are sorted by descending values.

340

341 **Supplementary Table 4. Functional classes and pathways significantly**  
342 **overrepresented in the UUO proteome.** (A) PANTHER protein class  
343 overrepresentation analysis ( $p \leq 0.05$ ) on the pool of UUO upregulated (N=195)  
344 and downregulated (N=458) proteins (respectively shown in Suppl. Table 2 and  
345 Suppl. Table 3). (B) KEGG pathways overrepresentation analysis ( $p \leq 0.05$ ),  
346 performed with DAVID functional annotation, on the pool of UUO-upregulated  
347 proteins.

348

## 349 **SUPPLEMENTARY MOVIES**

350

351 **Supplementary Movie 1. Dependence of TG2 vesicular trafficking on**  
352 **Syndecan-4 in primary TECs.** Wild type (WT) and SDC4-KO (SDC4<sup>-/-</sup>) primary  
353 TECs were transiently transfected with 5  $\mu\text{g}$  of pEGFP-N1-TG2 plasmid by

354 employing TransIT<sup>®</sup> transfection reagent (Mirus Bio). In order add back SDC4 in  
355 SDC4<sup>-/-</sup> TECs, cells were co-transfected with 5 μL pcDNA3.1(+)-hSdc4 plasmid.  
356 Time-lapse video clips were taken for WT TEC (A), SDC4<sup>-/-</sup> (B) and SDC4  
357 transfected SDC4<sup>-/-</sup>(C) TEC expressing EGFP-TG2 (green). EGFP-TG2 was  
358 recruited in globular elements protruding and retracting from the PM (A). Arrows  
359 indicate the formation of EGFP-TG2 vesicular blebbing on the edge of the cells.  
360 EGFP-TG2 was less dynamic and appeared to be retained in the cytosol in the  
361 SDC4-null TECs, which also had less budding activity than the wild type TECs (B).  
362 Add back of SDC4 in SDC4-null TECs restored EGFP-TG2 vesicular blebbing and  
363 “budding” reconstituted to wild type levels (C).

364

365

#### 366 **SUPPLEMENTARY DATA**

367

368 **Supplementary Data 1. Original processed data and z-test analysis for the**  
369 **TG2 interactome in UUO and sham operated kidney membranes.**

370

371 **Supplementary Data 2. Original processed for the kidney proteome in**  
372 **UUO and sham operated conditions.**

- 375 1. Vielhauer, V, Anders, HJ, Mack, M, Cihak, J, Strutz, F, Stangassinger, M, Luckow, B, Grone, HJ,  
376 Schlondorff, D: Obstructive nephropathy in the mouse: progressive fibrosis correlates with  
377 tubulointerstitial chemokine expression and accumulation of CC chemokine receptor 2- and  
378 5-positive leukocytes. *J Am Soc Nephrol*, 12: 1173-1187, 2001.
- 379 2. Huang, L, Haylor, JL, Hau, Z, Jones, RA, Vickers, ME, Wagner, B, Griffin, M, Saint, RE, Coutts, IG, El  
380 Nahas, AM, Johnson, TS: Transglutaminase inhibition ameliorates experimental diabetic  
381 nephropathy. *Kidney Int*, 76: 383-394, 2009.
- 382 3. Abe, M, Harpel, JG, Metz, CN, Nunes, I, Loskutoff, DJ, Rifkin, DB: An assay for transforming growth  
383 factor-beta using cells transfected with a plasminogen activator inhibitor-1 promoter-  
384 luciferase construct. *Anal Biochem*, 216: 276-284, 1994.
- 385 4. van Waarde, MA, van Assen, AJ, Kampinga, HH, Konings, AW, Vujaskovic, Z: Quantification of  
386 transforming growth factor-beta in biological material using cells transfected with a  
387 plasminogen activator inhibitor-1 promoter-luciferase construct. *Anal Biochem*, 247: 45-51,  
388 1997.
- 389 5. Scarpellini, A, Huang, L, Burhan, I, Schroeder, N, Funck, M, Johnson, TS, Verderio, EA: Syndecan-4  
390 knockout leads to reduced extracellular transglutaminase-2 and protects against  
391 tubulointerstitial fibrosis. *J Am Soc Nephrol*, 25: 1013-1027, 2014.
- 392 6. Gillet, LC, Navarro, P, Tate, S, Rost, H, Selevsek, N, Reiter, L, Bonner, R, Aebersold, R: Targeted data  
393 extraction of the MS/MS spectra generated by data-independent acquisition: a new concept  
394 for consistent and accurate proteome analysis. *Molecular & cellular proteomics : MCP*, 11:  
395 O111 016717, 2012.
- 396 7. Cheadle, C, Vawter, MP, Freed, WJ, Becker, KG: Analysis of microarray data using Z score  
397 transformation. *The Journal of molecular diagnostics : JMD*, 5: 73-81, 2003.
- 398 8. Magrane, M, UniProt, C: UniProt Knowledgebase: a hub of integrated protein data. *Database : the*  
399 *journal of biological databases and curation*, 2011: bar009, 2011.
- 400 9. Safran, M, Dalah, I, Alexander, J, Rosen, N, Iny Stein, T, Shmoish, M, Nativ, N, Bahir, I, Doniger, T,  
401 Krug, H, Sirota-Madi, A, Olender, T, Golan, Y, Stelzer, G, Harel, A, Lancet, D: GeneCards Version  
402 3: the human gene integrator. *Database : the journal of biological databases and curation*,  
403 2010: baq020, 2010.
- 404 10. Dennis, G, Jr., Sherman, BT, Hosack, DA, Yang, J, Gao, W, Lane, HC, Lempicki, RA: DAVID: Database  
405 for Annotation, Visualization, and Integrated Discovery. *Genome biology*, 4: P3, 2003.
- 406 11. Mi, H, Muruganujan, A, Casagrande, JT, Thomas, PD: Large-scale gene function analysis with the  
407 PANTHER classification system. *Nat Protoc*, 8: 1551-1566, 2013.
- 408 12. Szklarczyk, D, Franceschini, A, Wyder, S, Forslund, K, Heller, D, Huerta-Cepas, J, Simonovic, M, Roth,  
409 A, Santos, A, Tsafou, KP, Kuhn, M, Bork, P, Jensen, LJ, von Mering, C: STRING v10: protein-  
410 protein interaction networks, integrated over the tree of life. *Nucleic acids research*, 43: D447-  
411 452, 2015.
- 412 13. Bianco, F, Perrotta, C, Novellino, L, Francolini, M, Riganti, L, Menna, E, Saglietti, L, Schuchman, EH,  
413 Furlan, R, Clementi, E, Matteoli, M, Verderio, C: Acid sphingomyelinase activity triggers  
414 microparticle release from glial cells. *The EMBO journal*, 28: 1043-1054, 2009.
- 415 14. Benussi, L, Ciani, M, Tonoli, E, Morbin, M, Palamara, L, Albani, D, Fusco, F, Forloni, G, Glionna, M,  
416 Baco, M, Paterlini, A, Fostinelli, S, Santini, B, Galbiati, E, Gagni, P, Cretich, M, Binetti, G,  
417 Tagliavini, F, Prospero, D, Chiari, M, Ghidoni, R: Loss of exosomes in progranulin-associated  
418 frontotemporal dementia. *Neurobiology of aging*, 40: 41-49, 2016.
- 419 15. Fisher, M, Jones, RA, Huang, L, Haylor, JL, El Nahas, M, Griffin, M, Johnson, TS: Modulation of tissue  
420 transglutaminase in tubular epithelial cells alters extracellular matrix levels: a potential  
421 mechanism of tissue scarring. *Matrix biology : journal of the International Society for Matrix*  
422 *Biology*, 28: 20-31, 2009.



423 16. Sequeiros, T, Rigau, M, Chiva, C, Montes, M, Garcia-Grau, I, Garcia, M, Diaz, S, Celma, A, Bijnsdorp,  
424 I, Campos, A, Di Mauro, P, Borros, S, Reventos, J, Doll, A, Paciucci, R, Pegtel, M, de Torres, I,  
425 Sabido, E, Morote, J, Olivan, M: Targeted proteomics in urinary extracellular vesicles identifies  
426 biomarkers for diagnosis and prognosis of prostate cancer. *Oncotarget*, 8: 4960-4976, 2017.

# Supplementary Figure 1

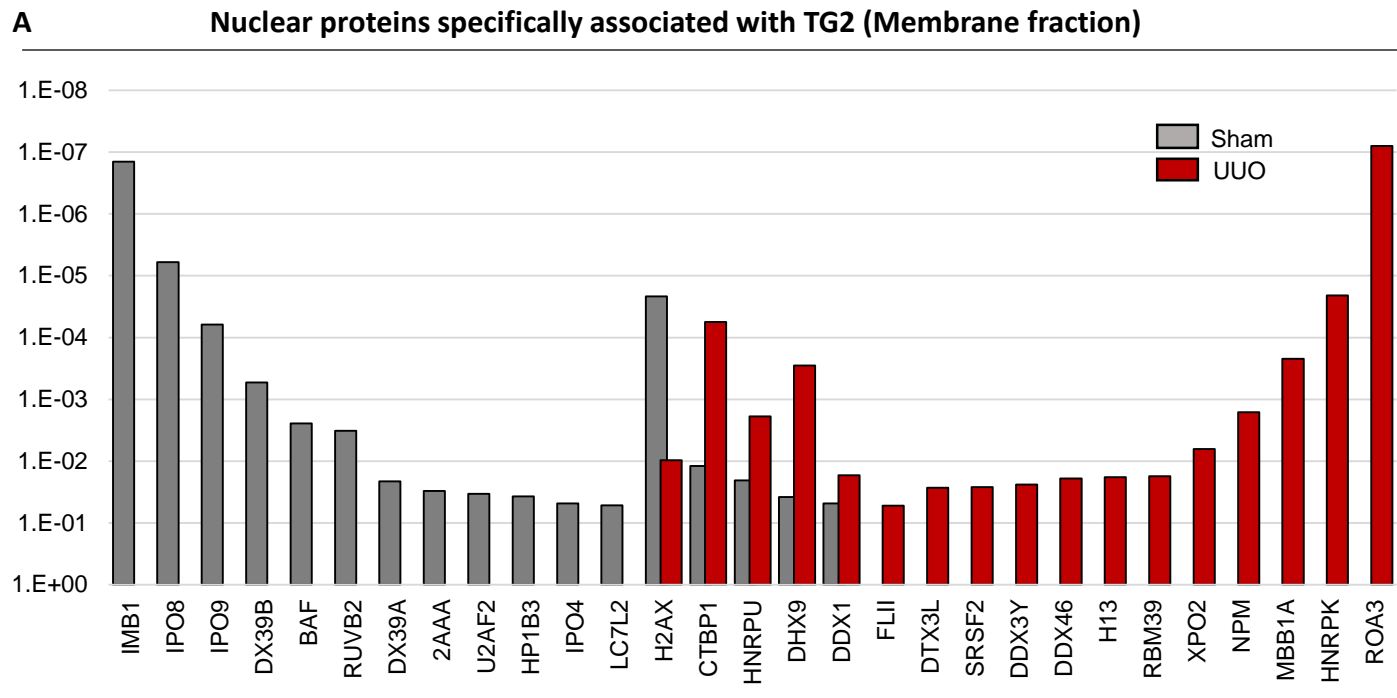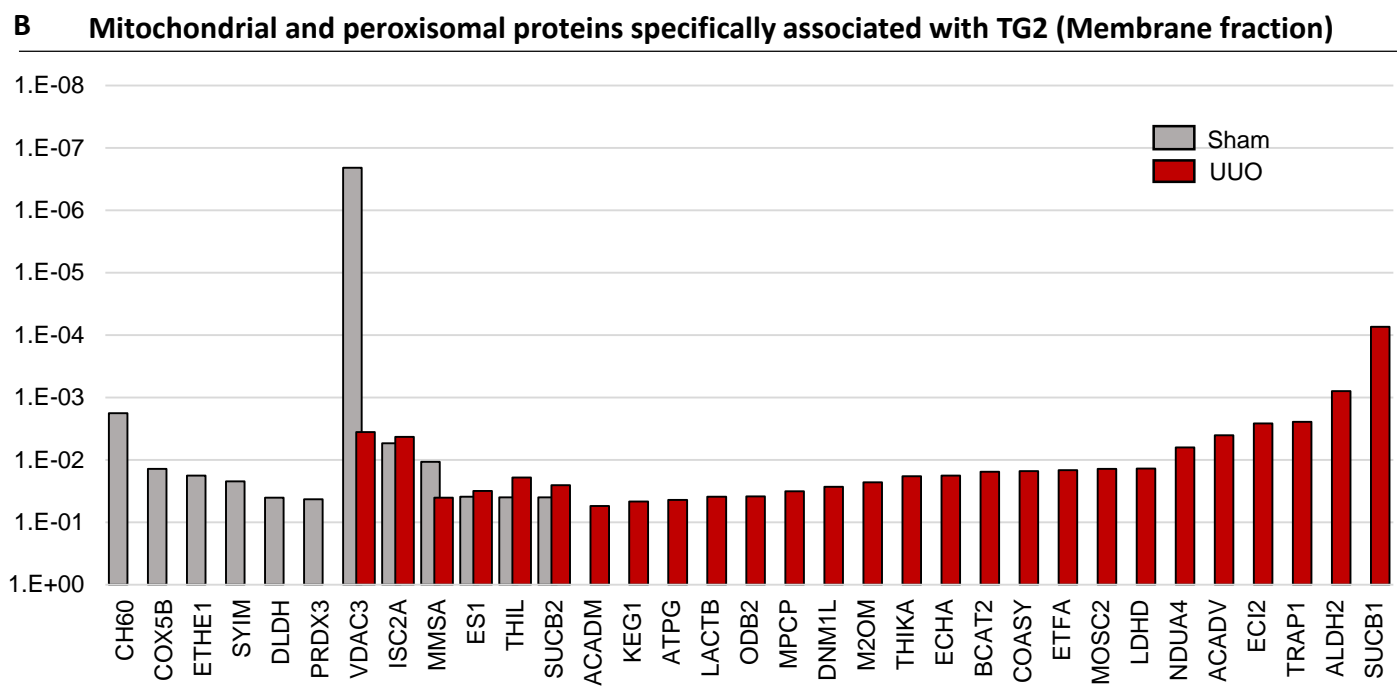

# New Supplementary Figure 2

★ Interacting with TG2 in the UUO proteome  
★ Increased in the UUO proteome

**A**

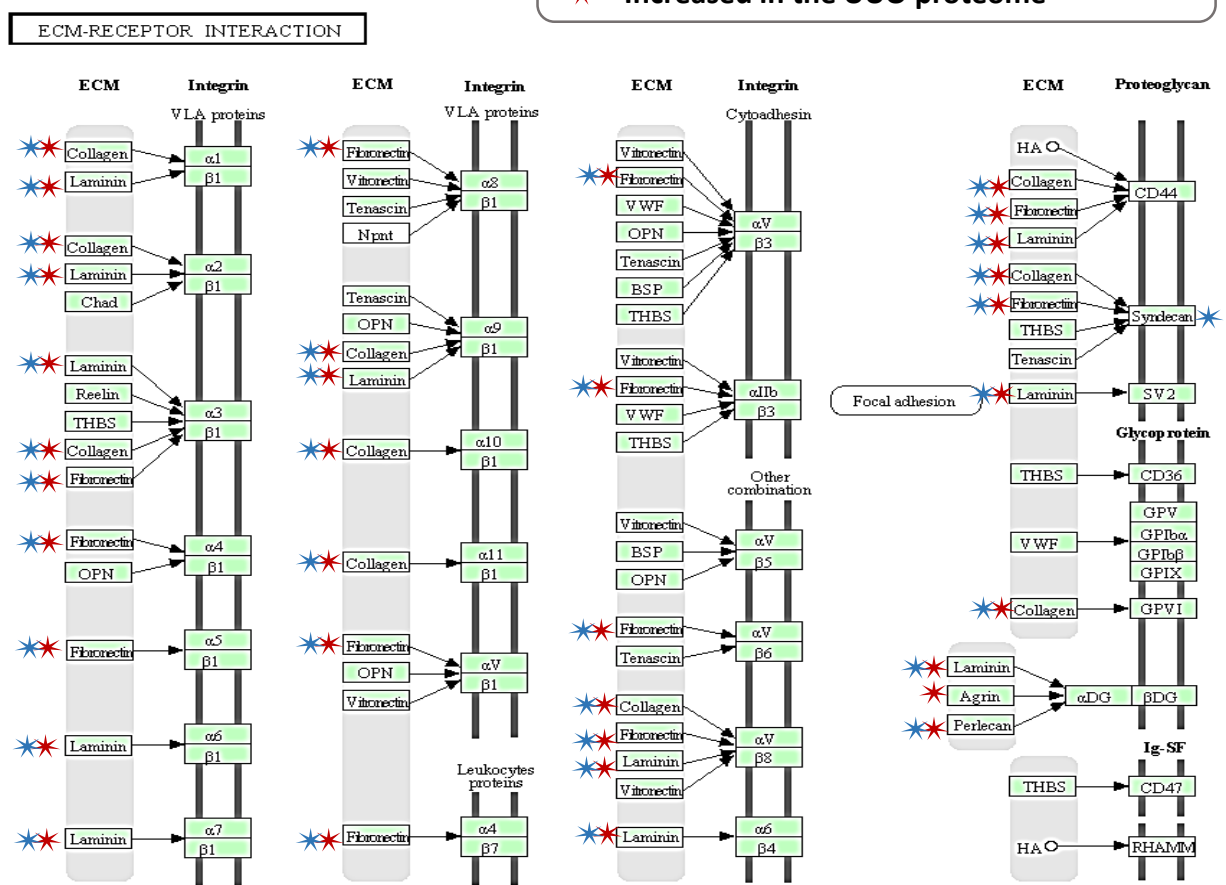

**B**

REGULATION OF ACTIN CYTOSKELETON

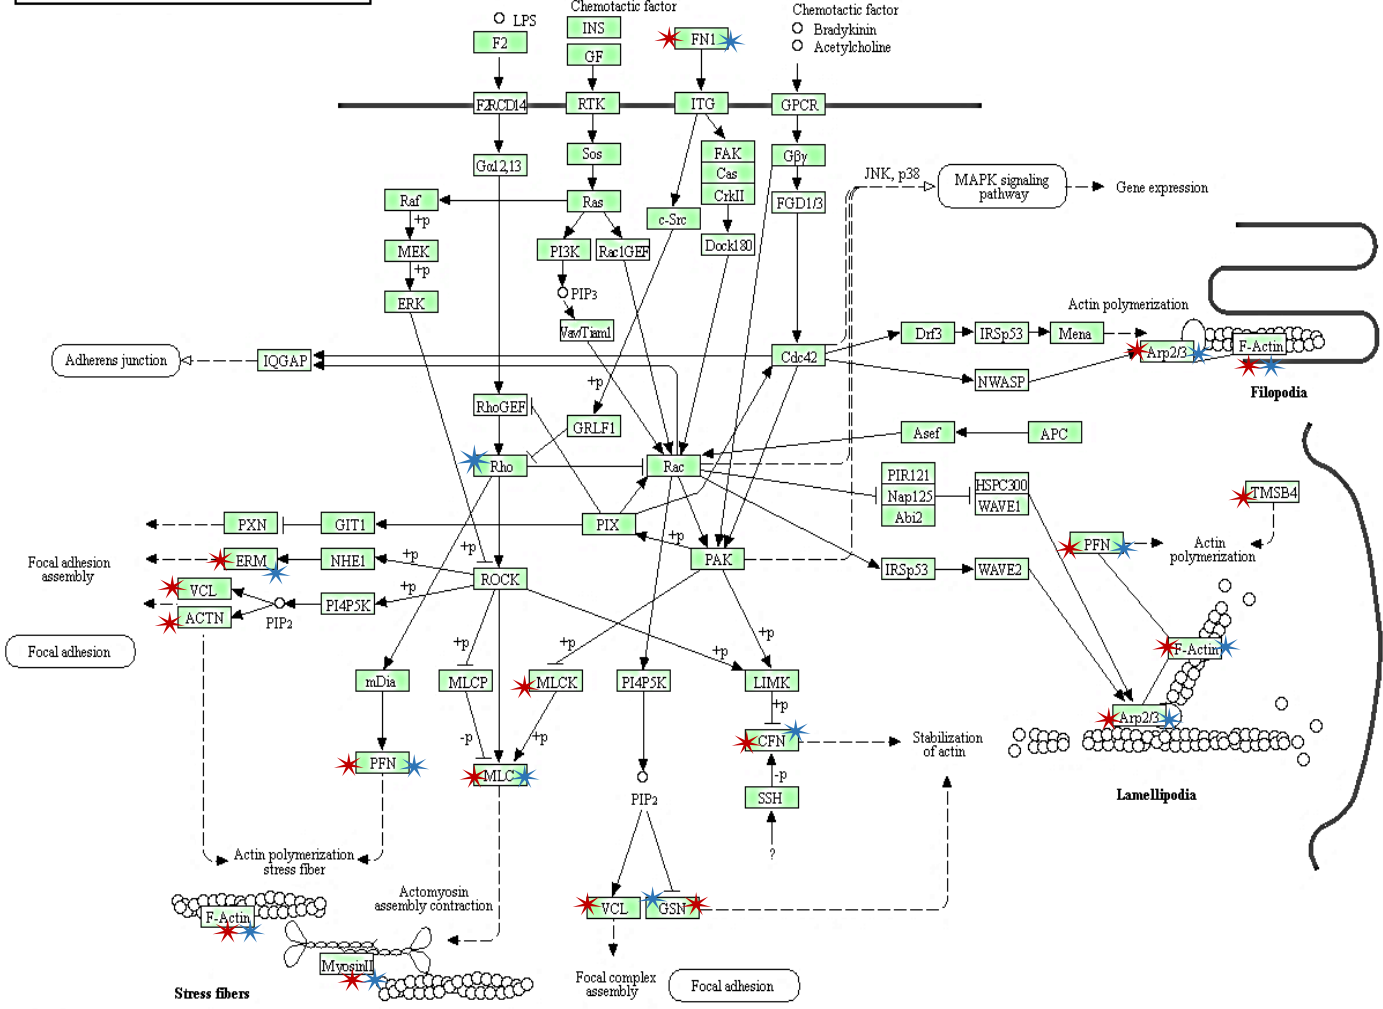

# Supplementary Figure 3

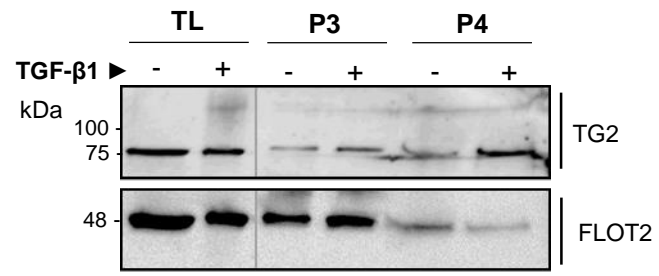

# New Supplementary Figure 4

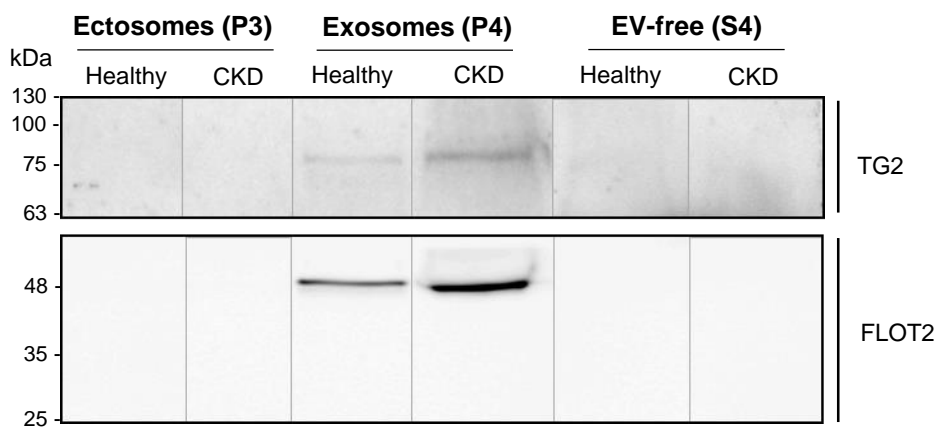

# Supplementary Table 1

## Ribosomal proteins specifically associated with TG2

A

| UUO kidney (membrane fraction) |                                     |   |          |     |
|--------------------------------|-------------------------------------|---|----------|-----|
| Sample ID                      | Name                                | N | P value  | U/S |
| RL3_MOUSE                      | 60S ribosomal protein L3            | 5 | 1.26E-09 | U/S |
| RS7_MOUSE                      | 40S ribosomal protein S7            | 5 | 5.39E-06 | U/S |
| RS13_MOUSE                     | 40S ribosomal protein S13           | 5 | 3.03E-05 | U/S |
| RS3_MOUSE                      | 40S ribosomal protein S3            | 5 | 5.17E-05 | U/S |
| RL6_MOUSE                      | 60S ribosomal protein L6            | 5 | 1.36E-04 | U/S |
| RL18A_MOUSE                    | 60S ribosomal protein L18a          | 5 | 4.63E-04 | U   |
| RS6_MOUSE                      | 40S ribosomal protein S6            | 5 | 2.49E-03 | U/S |
| RLA2_MOUSE                     | 60S acidic ribosomal protein P2     | 5 | 2.80E-03 | U   |
| RLA0_MOUSE                     | 60S acidic ribosomal protein P0     | 5 | 2.92E-03 | U/S |
| RL35A_MOUSE                    | 60S ribosomal protein L35a          | 5 | 3.22E-03 | U   |
| RL18A_MOUSE                    | 60S ribosomal protein L18a          | 5 | 3.40E-03 | U   |
| RS14_MOUSE                     | 40S ribosomal protein S14           | 5 | 6.38E-03 | U/S |
| RL23_MOUSE                     | 60S ribosomal protein L23           | 5 | 7.99E-03 | U   |
| RL11_MOUSE                     | 60S ribosomal protein L11           | 5 | 8.87E-03 | U   |
| RL10A_MOUSE                    | 60S ribosomal protein L10a          | 5 | 9.04E-03 | U   |
| RL9_MOUSE                      | 60S ribosomal protein L9            | 5 | 1.04E-02 | U   |
| RL17_MOUSE                     | 60S ribosomal protein L17           | 5 | 1.05E-02 | U   |
| RS24_MOUSE                     | 40S ribosomal protein S24           | 5 | 1.13E-02 | U   |
| RL8_MOUSE                      | 60S ribosomal protein L8            | 5 | 1.91E-02 | U   |
| RL4_MOUSE                      | 60S ribosomal protein L4            | 5 | 2.54E-02 | U   |
| RL23A_MOUSE                    | 60S ribosomal protein L23a          | 5 | 2.70E-02 | U   |
| RS15_MOUSE                     | 40S ribosomal protein S15           | 5 | 2.71E-02 | U   |
| RL40_MOUSE                     | Ubiquitin-60S ribosomal protein L40 | 5 | 3.64E-02 | U   |
| RL13A_MOUSE                    | 60S ribosomal protein L13a          | 5 | 4.35E-02 | U   |

B

| Sham operated kidney (membrane fraction) |                                 |   |          |     |
|------------------------------------------|---------------------------------|---|----------|-----|
| Sample ID                                | Name                            | N | P value  | U/S |
| RS17_MOUSE                               | 40S ribosomal protein S17       | 5 | 4.03E-03 | S   |
| RL6_MOUSE                                | 60S ribosomal protein L6        | 5 | 6.05E-03 | U/S |
| RL3_MOUSE                                | 60S ribosomal protein L3        | 5 | 6.23E-03 | U/S |
| RS3_MOUSE                                | 40S ribosomal protein S3        | 5 | 9.02E-03 | U/S |
| RS13_MOUSE                               | 40S ribosomal protein S13       | 5 | 1.21E-02 | U/S |
| RLA0_MOUSE                               | 60S acidic ribosomal protein P0 | 5 | 1.30E-02 | U/S |
| RS14_MOUSE                               | 40S ribosomal protein S14       | 5 | 2.48E-02 | U/S |
| RS6_MOUSE                                | 40S ribosomal protein S6        | 5 | 2.73E-02 | U/S |
| RS7_MOUSE                                | 40S ribosomal protein S7        | 5 | 3.52E-02 | U/S |

## Immunoglobulin proteins specifically associated with TG2

C

| UUO kidney (membrane fraction) |                                  |   |          |     |
|--------------------------------|----------------------------------|---|----------|-----|
| Sample ID                      | Name                             | N | P value  | U/S |
| LAC2_MOUSE                     | Ig lambda-1 chain C region       | 5 | 2.66E-03 | U   |
| HVM32_MOUSE                    | Ig heavy chain V-III region J606 | 5 | 2.30E-02 | U   |

# New Supplementary Table 2:

UUO kidney proteome – UUO / Sham > 1 (Confidence > 80%)

| Protein ID  | UUO/Sham | Confidence | Protein ID  | UUO/Sham | Confidence | Protein ID  | UUO/Sham | Confidence |
|-------------|----------|------------|-------------|----------|------------|-------------|----------|------------|
| UROM_MOUSE  | 16.34    | 0.85       | LMNA_MOUSE  | 3.49     | 0.94       | ANT3_MOUSE  | 2.27     | 0.86       |
| COCA1_MOUSE | 15.92    | 0.82       | CO4B_MOUSE  | 3.44     | 0.86       | LAMA5_MOUSE | 2.26     | 0.83       |
| FBN1_MOUSE  | 10.84    | 0.89       | ARC1B_MOUSE | 3.38     | 0.87       | COR1C_MOUSE | 2.23     | 0.83       |
| FBLN2_MOUSE | 9.65     | 0.81       | TBB5_MOUSE  | 3.33     | 0.88       | CAPZB_MOUSE | 2.23     | 0.89       |
| K1C19_MOUSE | 9.57     | 0.86       | APOE_MOUSE  | 3.31     | 0.87       | FUS_MOUSE   | 2.22     | 0.80       |
| TAGL_MOUSE  | 9.27     | 0.89       | MYH11_MOUSE | 3.28     | 0.87       | AGRIN_MOUSE | 2.16     | 0.92       |
| PGS1_MOUSE  | 8.73     | 0.86       | MYH10_MOUSE | 3.27     | 0.85       | AN32B_MOUSE | 2.15     | 0.81       |
| CNN1_MOUSE  | 8.59     | 0.80       | FETUA_MOUSE | 3.27     | 0.90       | KHDR1_MOUSE | 2.14     | 0.84       |
| VIME_MOUSE  | 8.56     | 0.90       | ESYT2_MOUSE | 3.23     | 0.86       | PROF1_MOUSE | 2.10     | 0.89       |
| HA2U_MOUSE  | 8.32     | 0.80       | GCAB_MOUSE  | 3.21     | 0.91       | NID1_MOUSE  | 2.10     | 0.92       |
| ANXA1_MOUSE | 8.17     | 0.84       | ACTA_MOUSE  | 3.17     | 0.94       | H2AV_MOUSE  | 2.07     | 0.86       |
| MT2_MOUSE   | 8.11     | 0.84       | VTDB_MOUSE  | 3.13     | 0.93       | COR1B_MOUSE | 2.06     | 0.86       |
| POSTN_MOUSE | 8.04     | 0.80       | EST1C_MOUSE | 3.11     | 0.95       | A2M_MOUSE   | 2.05     | 0.85       |
| A1AT2_MOUSE | 7.86     | 0.82       | KNG1_MOUSE  | 3.09     | 0.91       | INO1_MOUSE  | 2.03     | 0.81       |
| FINC_MOUSE  | 7.85     | 0.84       | MYL9_MOUSE  | 3.08     | 0.98       | LIMA1_MOUSE | 2.02     | 0.87       |
| COR1A_MOUSE | 7.77     | 0.80       | S10AB_MOUSE | 3.08     | 0.88       | GNAI2_MOUSE | 2.02     | 0.83       |
| CO3A1_MOUSE | 7.72     | 0.92       | A1AT1_MOUSE | 3.07     | 0.86       | ARPC3_MOUSE | 2.01     | 0.87       |
| PLSL_MOUSE  | 7.63     | 0.85       | IGG2B_MOUSE | 3.07     | 0.81       | WDR1_MOUSE  | 2.01     | 0.83       |
| CO1A1_MOUSE | 7.61     | 0.96       | SH3L1_MOUSE | 3.06     | 0.86       | UBC9_MOUSE  | 1.97     | 0.91       |
| KCRB_MOUSE  | 7.56     | 0.83       | K2C79_MOUSE | 3.05     | 0.91       | HP1B3_MOUSE | 1.94     | 0.83       |
| FBN2_MOUSE  | 7.26     | 0.94       | TAGL2_MOUSE | 3.04     | 0.88       | ACTBL_MOUSE | 1.91     | 0.84       |
| MIME_MOUSE  | 6.67     | 0.83       | K1C18_MOUSE | 2.99     | 0.94       | ROA3_MOUSE  | 1.90     | 0.90       |
| CKAP4_MOUSE | 6.57     | 0.85       | ALBU_MOUSE  | 2.98     | 0.92       | NONO_MOUSE  | 1.90     | 0.91       |
| LUM_MOUSE   | 6.55     | 0.87       | PTRF_MOUSE  | 2.96     | 0.84       | ABCB7_MOUSE | 1.89     | 0.89       |
| FBLN3_MOUSE | 6.33     | 0.80       | VAT1_MOUSE  | 2.96     | 0.90       | ARP3_MOUSE  | 1.89     | 0.95       |
| SERPH_MOUSE | 6.19     | 0.94       | SEPT7_MOUSE | 2.95     | 0.82       | ARPC2_MOUSE | 1.87     | 0.83       |
| CNN2_MOUSE  | 6.15     | 0.80       | PSME2_MOUSE | 2.91     | 0.88       | NH2L1_MOUSE | 1.86     | 0.81       |
| LEG1_MOUSE  | 6.15     | 0.87       | B2MG_MOUSE  | 2.88     | 0.82       | LAMC1_MOUSE | 1.85     | 0.93       |
| DESM_MOUSE  | 5.98     | 0.94       | CERU_MOUSE  | 2.86     | 0.80       | LAMB1_MOUSE | 1.85     | 0.85       |
| FBLN5_MOUSE | 5.81     | 0.84       | EPT2_MOUSE  | 2.83     | 0.82       | HNRPF_MOUSE | 1.82     | 0.83       |
| RET1_MOUSE  | 5.56     | 0.83       | COF1_MOUSE  | 2.74     | 0.87       | FABP4_MOUSE | 1.82     | 0.85       |
| PDL17_MOUSE | 5.40     | 0.81       | A1AT4_MOUSE | 2.72     | 0.83       | LASP1_MOUSE | 1.81     | 0.81       |
| CLUS_MOUSE  | 5.35     | 0.81       | ANXA6_MOUSE | 2.71     | 0.89       | PGBM_MOUSE  | 1.80     | 0.81       |
| K2C5_MOUSE  | 5.24     | 0.83       | ADPRH_MOUSE | 2.71     | 0.86       | TADBP_MOUSE | 1.80     | 0.81       |
| FLNA_MOUSE  | 5.07     | 0.93       | DPYL2_MOUSE | 2.68     | 0.88       | NUCL_MOUSE  | 1.79     | 0.83       |
| MYOF_MOUSE  | 4.99     | 0.86       | CO4A1_MOUSE | 2.67     | 0.88       | DX39B_MOUSE | 1.78     | 0.81       |
| K2C8_MOUSE  | 4.93     | 0.89       | MAP4_MOUSE  | 2.66     | 0.82       | ANXA4_MOUSE | 1.78     | 0.85       |
| CO6A1_MOUSE | 4.78     | 0.88       | CATD_MOUSE  | 2.65     | 0.82       | TLN1_MOUSE  | 1.78     | 0.82       |
| CO6A2_MOUSE | 4.76     | 0.94       | GBG2_MOUSE  | 2.65     | 0.81       | FUBP2_MOUSE | 1.78     | 0.80       |
| ANXA3_MOUSE | 4.73     | 0.83       | ROA1_MOUSE  | 2.63     | 0.88       | ARP2_MOUSE  | 1.76     | 0.88       |
| FIBA_MOUSE  | 4.64     | 0.90       | ISG15_MOUSE | 2.62     | 0.84       | RUXF_MOUSE  | 1.75     | 0.87       |
| COEA1_MOUSE | 4.62     | 0.81       | FETUB_MOUSE | 2.61     | 0.89       | HNRPM_MOUSE | 1.74     | 0.86       |
| HEMO_MOUSE  | 4.60     | 0.86       | MYH9_MOUSE  | 2.61     | 0.99       | CSRP2_MOUSE | 1.72     | 0.82       |
| CSRP1_MOUSE | 4.52     | 0.89       | CO3_MOUSE   | 2.59     | 0.87       | TGM2_MOUSE  | 1.71     | 0.90       |
| CO4A2_MOUSE | 4.50     | 0.80       | MYLK_MOUSE  | 2.59     | 0.80       | LAP2B_MOUSE | 1.71     | 0.80       |
| FIBG_MOUSE  | 4.45     | 0.85       | S10AA_MOUSE | 2.59     | 0.86       | SRSF2_MOUSE | 1.70     | 0.86       |
| EMIL1_MOUSE | 4.42     | 0.82       | VMA5A_MOUSE | 2.58     | 0.86       | PDIA6_MOUSE | 1.68     | 0.90       |
| TBA1A_MOUSE | 4.41     | 0.96       | CO1A1_MOUSE | 2.57     | 0.96       | 1433G_MOUSE | 1.65     | 0.81       |
| TYB4_MOUSE  | 4.35     | 0.88       | MYL6_MOUSE  | 2.53     | 0.92       | SMAP_MOUSE  | 1.64     | 0.88       |
| TPM1_MOUSE  | 4.28     | 0.84       | CATZ_MOUSE  | 2.53     | 0.86       | LSM3_MOUSE  | 1.62     | 0.91       |
| K2C7_MOUSE  | 4.27     | 0.88       | SF3B3_MOUSE | 2.51     | 0.83       | RSU1_MOUSE  | 1.59     | 0.84       |
| PEDF_MOUSE  | 4.24     | 0.81       | APOA4_MOUSE | 2.50     | 0.82       | SC11A_MOUSE | 1.59     | 0.80       |
| ACTN1_MOUSE | 4.22     | 0.96       | CAP1_MOUSE  | 2.50     | 0.92       | ABRAL_MOUSE | 1.56     | 0.80       |
| TPM4_MOUSE  | 4.19     | 0.91       | APOH_MOUSE  | 2.50     | 0.80       | ACTB_MOUSE  | 1.56     | 0.93       |
| IGKC_MOUSE  | 4.15     | 0.87       | APOA1_MOUSE | 2.46     | 0.92       | HNRPU_MOUSE | 1.53     | 0.85       |
| FIBB_MOUSE  | 4.00     | 0.86       | SET_MOUSE   | 2.46     | 0.83       | MOES_MOUSE  | 1.52     | 0.81       |
| MYADM_MOUSE | 4.00     | 0.87       | SFPQ_MOUSE  | 2.44     | 0.81       | GDIR1_MOUSE | 1.51     | 0.84       |
| SH3L3_MOUSE | 3.85     | 0.90       | RBM3_MOUSE  | 2.36     | 0.84       | HNRH1_MOUSE | 1.48     | 0.87       |
| TRFE_MOUSE  | 3.78     | 0.91       | T22D1_MOUSE | 2.35     | 0.90       | SMD2_MOUSE  | 1.47     | 0.81       |
| ANXA2_MOUSE | 3.76     | 0.90       | TIF1B_MOUSE | 2.33     | 0.83       | KAPCA_MOUSE | 1.44     | 0.89       |
| G6PE_MOUSE  | 3.71     | 0.90       | GELS_MOUSE  | 2.33     | 0.84       | PDIA4_MOUSE | 1.40     | 0.80       |
| CALU_MOUSE  | 3.69     | 0.84       | VINC_MOUSE  | 2.33     | 0.94       | HNRPK_MOUSE | 1.40     | 0.82       |
| SPB6_MOUSE  | 3.56     | 0.89       | ML12B_MOUSE | 2.33     | 0.83       | LAMP1_MOUSE | 1.38     | 0.81       |
| CRIP1_MOUSE | 3.55     | 0.90       | LMNB1_MOUSE | 2.30     | 0.86       |             |          |            |
| EFHD2_MOUSE | 3.52     | 0.87       | ANXA5_MOUSE | 2.29     | 0.84       |             |          |            |
| ESYT1_MOUSE | 3.52     | 0.82       | PSME1_MOUSE | 2.28     | 0.84       |             |          |            |

# New Supplementary Table 3

## UUO kidney proteome – UUO / Sham < 1 (Confidence > 80%)

| Protein ID  | Sham/UUO | Confidence | Protein ID  | Sham/UUO | Confidence | Protein ID  | Sham/UUO | Confidence |
|-------------|----------|------------|-------------|----------|------------|-------------|----------|------------|
| G6PC_MOUSE  | 72.24    | 0.86       | GSTA3_MOUSE | 10.63    | 0.81       | AUHM_MOUSE  | 7.85     | 0.85       |
| AADAT_MOUSE | 48.00    | 0.84       | CK054_MOUSE | 10.61    | 0.82       | COASY_MOUSE | 7.83     | 0.85       |
| PDZ1I_MOUSE | 45.76    | 0.84       | AK1A1_MOUSE | 10.56    | 0.91       | NLTP_MOUSE  | 7.82     | 0.88       |
| HAOX2_MOUSE | 44.28    | 0.85       | 3HIDH_MOUSE | 10.55    | 0.94       | NDUB7_MOUSE | 7.79     | 0.84       |
| CALB1_MOUSE | 32.07    | 0.91       | SUCB2_MOUSE | 10.42    | 0.94       | TAU_MOUSE   | 7.76     | 0.83       |
| ASSY_MOUSE  | 21.28    | 0.88       | LACB2_MOUSE | 10.39    | 0.82       | THTR_MOUSE  | 7.75     | 0.89       |
| ACSM1_MOUSE | 20.87    | 0.83       | FAHD1_MOUSE | 10.39    | 0.84       | PPA6_MOUSE  | 7.74     | 0.85       |
| F16P1_MOUSE | 20.84    | 0.81       | FMO1_MOUSE  | 10.33    | 0.82       | QOR_MOUSE   | 7.71     | 0.84       |
| ACSM2_MOUSE | 20.17    | 0.86       | IVD_MOUSE   | 10.14    | 0.88       | ACSL1_MOUSE | 7.69     | 0.90       |
| ECHP_MOUSE  | 19.92    | 0.84       | THIL_MOUSE  | 10.10    | 0.95       | CRYL1_MOUSE | 7.62     | 0.90       |
| KAD4_MOUSE  | 19.83    | 0.89       | PROD_MOUSE  | 10.05    | 0.81       | LRP2_MOUSE  | 7.60     | 0.84       |
| AT1B1_MOUSE | 19.55    | 0.87       | SARDH_MOUSE | 10.05    | 0.85       | CX7A1_MOUSE | 7.60     | 0.93       |
| CAD16_MOUSE | 19.54    | 0.92       | INMT_MOUSE  | 10.03    | 0.83       | HGD_MOUSE   | 7.58     | 0.84       |
| PYC_MOUSE   | 18.04    | 0.87       | AL1L1_MOUSE | 9.95     | 0.91       | CH60_MOUSE  | 7.56     | 0.96       |
| GSTA2_MOUSE | 17.14    | 0.85       | KHK_MOUSE   | 9.90     | 0.83       | C560_MOUSE  | 7.55     | 0.83       |
| AL8A1_MOUSE | 17.11    | 0.88       | ARK72_MOUSE | 9.87     | 0.87       | NDUS1_MOUSE | 7.55     | 0.94       |
| ATNG_MOUSE  | 16.80    | 0.90       | S22AI_MOUSE | 9.86     | 0.90       | CP013_MOUSE | 7.48     | 0.87       |
| UD3A2_MOUSE | 16.72    | 0.83       | HCDH_MOUSE  | 9.82     | 0.90       | COX41_MOUSE | 7.46     | 0.94       |
| S100G_MOUSE | 16.59    | 0.90       | NDUB6_MOUSE | 9.77     | 0.81       | ACD11_MOUSE | 7.41     | 0.80       |
| ACS2L_MOUSE | 16.56    | 0.89       | CISD1_MOUSE | 9.75     | 0.95       | CX7A2_MOUSE | 7.37     | 0.92       |
| KEG1_MOUSE  | 16.36    | 0.88       | NDRG1_MOUSE | 9.52     | 0.99       | NAKD2_MOUSE | 7.33     | 0.95       |
| SCSA2_MOUSE | 16.23    | 0.80       | S13A3_MOUSE | 9.52     | 0.88       | VATG1_MOUSE | 7.31     | 0.83       |
| ECHD2_MOUSE | 16.09    | 0.87       | CYC_MOUSE   | 9.49     | 0.92       | NDUA4_MOUSE | 7.30     | 0.89       |
| CGL_MOUSE   | 16.04    | 0.86       | SSDH_MOUSE  | 9.47     | 0.88       | AIFM1_MOUSE | 7.30     | 0.92       |
| 3HAO_MOUSE  | 15.56    | 0.85       | SCOT1_MOUSE | 9.34     | 0.92       | CDD_MOUSE   | 7.28     | 0.81       |
| S27A2_MOUSE | 14.88    | 0.81       | HMGCL_MOUSE | 9.26     | 0.92       | MUTA_MOUSE  | 7.27     | 0.81       |
| MEP1B_MOUSE | 14.72    | 0.82       | ACPM_MOUSE  | 9.19     | 0.92       | MCCA_MOUSE  | 7.25     | 0.82       |
| ACADM_MOUSE | 14.48    | 0.86       | ATPK_MOUSE  | 9.17     | 0.80       | NDUB4_MOUSE | 7.21     | 0.83       |
| TMM27_MOUSE | 14.41    | 0.85       | MSRA_MOUSE  | 9.12     | 0.83       | ECHM_MOUSE  | 7.21     | 0.90       |
| ISC2A_MOUSE | 14.27    | 0.90       | CBR1_MOUSE  | 9.11     | 0.92       | ATP5H_MOUSE | 7.21     | 0.93       |
| BDH_MOUSE   | 14.24    | 0.89       | LDHD_MOUSE  | 9.10     | 0.88       | OCTC_MOUSE  | 7.20     | 0.80       |
| ALDOB_MOUSE | 14.21    | 0.93       | COX5A_MOUSE | 9.08     | 0.94       | CMC2_MOUSE  | 7.20     | 0.80       |
| HOT_MOUSE   | 14.07    | 0.84       | ETFA_MOUSE  | 9.07     | 0.93       | NDUS4_MOUSE | 7.19     | 0.83       |
| GATM_MOUSE  | 13.91    | 0.87       | NDUB5_MOUSE | 9.01     | 0.85       | CBR4_MOUSE  | 7.19     | 0.85       |
| GABT_MOUSE  | 13.84    | 0.93       | PLSI_MOUSE  | 9.01     | 0.86       | DLDH_MOUSE  | 7.18     | 0.94       |
| KBL_MOUSE   | 13.82    | 0.85       | GPDA_MOUSE  | 8.85     | 0.91       | AL7A1_MOUSE | 7.16     | 0.82       |
| MMSA_MOUSE  | 13.79    | 0.88       | NIPS1_MOUSE | 8.81     | 0.91       | MEP1A_MOUSE | 7.15     | 0.88       |
| PXMP2_MOUSE | 13.77    | 0.81       | NU4M_MOUSE  | 8.79     | 0.89       | QCR2_MOUSE  | 7.14     | 0.94       |
| ST1D1_MOUSE | 13.74    | 0.85       | FAHD2_MOUSE | 8.76     | 0.80       | C1TC_MOUSE  | 7.12     | 0.87       |
| GGT1_MOUSE  | 13.58    | 0.89       | CLYBL_MOUSE | 8.75     | 0.80       | QCR8_MOUSE  | 7.12     | 0.91       |
| MAAI_MOUSE  | 13.49    | 0.82       | FBX50_MOUSE | 8.73     | 0.80       | MGST3_MOUSE | 7.12     | 0.84       |
| PGAM2_MOUSE | 13.44    | 0.88       | NDUS6_MOUSE | 8.72     | 0.81       | ADT2_MOUSE  | 7.06     | 0.81       |
| GLYAT_MOUSE | 13.43    | 0.88       | THNS2_MOUSE | 8.70     | 0.83       | ATP8_MOUSE  | 6.97     | 0.90       |
| S4AA_MOUSE  | 13.29    | 0.83       | NDUB8_MOUSE | 8.67     | 0.86       | ATPG_MOUSE  | 6.96     | 0.90       |
| FAAA_MOUSE  | 13.16    | 0.92       | NU5M_MOUSE  | 8.67     | 0.88       | NDUAA_MOUSE | 6.92     | 0.93       |
| AT1A1_MOUSE | 13.14    | 0.93       | PECR_MOUSE  | 8.65     | 0.87       | S12A1_MOUSE | 6.91     | 0.96       |
| DHSO_MOUSE  | 13.11    | 0.82       | SDHA_MOUSE  | 8.64     | 0.98       | AQP1_MOUSE  | 6.91     | 0.80       |
| MPC1_MOUSE  | 12.91    | 0.93       | NDUBA_MOUSE | 8.63     | 0.86       | ODO_MOUSE   | 6.89     | 0.89       |
| UK114_MOUSE | 12.69    | 0.94       | SUCA_MOUSE  | 8.55     | 0.94       | TBA4A_MOUSE | 6.89     | 0.88       |
| ACE_MOUSE   | 12.66    | 0.91       | NDUV2_MOUSE | 8.50     | 0.84       | ATPO_MOUSE  | 6.84     | 0.96       |
| DECR2_MOUSE | 12.62    | 0.90       | IPYR2_MOUSE | 8.50     | 0.83       | PCCA_MOUSE  | 6.83     | 0.84       |
| CATA_MOUSE  | 12.62    | 0.94       | NDUV1_MOUSE | 8.43     | 0.90       | BPNT1_MOUSE | 6.81     | 0.87       |
| ACY3_MOUSE  | 12.43    | 0.80       | NDUA9_MOUSE | 8.38     | 0.89       | PTER_MOUSE  | 6.73     | 0.91       |
| S22A2_MOUSE | 12.29    | 0.81       | ABCD3_MOUSE | 8.36     | 0.88       | FGGY_MOUSE  | 6.73     | 0.85       |
| GSTK1_MOUSE | 12.27    | 0.82       | ATPD_MOUSE  | 8.32     | 0.98       | ECI2_MOUSE  | 6.73     | 0.85       |
| PCCB_MOUSE  | 12.22    | 0.96       | QCR6_MOUSE  | 8.31     | 0.93       | NDUS2_MOUSE | 6.72     | 0.91       |
| AL4A1_MOUSE | 12.17    | 0.93       | NDUA1_MOUSE | 8.25     | 0.86       | ES1_MOUSE   | 6.71     | 0.92       |
| CES1D_MOUSE | 11.96    | 0.83       | COX5B_MOUSE | 8.24     | 0.91       | ACON_MOUSE  | 6.66     | 0.90       |
| GLPK_MOUSE  | 11.89    | 0.86       | IDHP_MOUSE  | 8.21     | 0.93       | NDUS3_MOUSE | 6.64     | 0.96       |
| QORL2_MOUSE | 11.85    | 0.82       | SBP1_MOUSE  | 8.19     | 0.92       | MDHM_MOUSE  | 6.63     | 0.96       |
| AAAD_MOUSE  | 11.84    | 0.85       | NDUS7_MOUSE | 8.16     | 0.94       | ATP5I_MOUSE | 6.62     | 0.90       |
| VILI_MOUSE  | 11.78    | 0.91       | BDH2_MOUSE  | 8.13     | 0.82       | USMG5_MOUSE | 6.60     | 0.97       |
| DHAK_MOUSE  | 11.77    | 0.80       | ETFB_MOUSE  | 8.13     | 0.91       | FUMH_MOUSE  | 6.56     | 0.89       |
| COX1_MOUSE  | 11.70    | 0.90       | NHRF1_MOUSE | 8.07     | 0.94       | ATPB_MOUSE  | 6.55     | 0.94       |
| SODM_MOUSE  | 11.66    | 0.93       | NEP_MOUSE   | 8.05     | 0.90       | FABPH_MOUSE | 6.53     | 0.88       |
| S2542_MOUSE | 11.63    | 0.86       | NDUAD_MOUSE | 8.00     | 0.89       | AQP3_MOUSE  | 6.51     | 0.90       |
| MPC2_MOUSE  | 11.60    | 0.82       | CSAD_MOUSE  | 8.00     | 0.90       | CX6B1_MOUSE | 6.48     | 0.92       |
| ATP5L_MOUSE | 11.54    | 0.80       | COX2_MOUSE  | 7.99     | 0.87       | NDUA5_MOUSE | 6.48     | 0.90       |
| OXDA_MOUSE  | 11.38    | 0.81       | SDHB_MOUSE  | 7.99     | 0.89       | VVA8_MOUSE  | 6.46     | 0.82       |
| NUD19_MOUSE | 11.28    | 0.90       | TPMT_MOUSE  | 7.98     | 0.93       | ATPA_MOUSE  | 6.46     | 0.96       |
| HINT2_MOUSE | 11.27    | 0.98       | CY1_MOUSE   | 7.96     | 0.94       | DHRS4_MOUSE | 6.42     | 0.91       |
| BPHL_MOUSE  | 11.09    | 0.87       | TOM5_MOUSE  | 7.94     | 1.00       | SUSD2_MOUSE | 6.38     | 0.92       |
| MCCB_MOUSE  | 10.95    | 0.90       | COQ9_MOUSE  | 7.91     | 0.90       | QCR1_MOUSE  | 6.37     | 0.94       |
| PBLD1_MOUSE | 10.91    | 0.87       | IDHG_MOUSE  | 7.91     | 0.91       | NDUA7_MOUSE | 6.36     | 0.91       |
| DIC_MOUSE   | 10.83    | 0.83       | THIM_MOUSE  | 7.90     | 0.91       | SFXN1_MOUSE | 6.35     | 0.83       |
| ACD10_MOUSE | 10.77    | 0.86       | UCRI_MOUSE  | 7.89     | 0.91       | QCR7_MOUSE  | 6.34     | 0.89       |
| NHRF3_MOUSE | 10.71    | 0.86       | NDUA3_MOUSE | 7.86     | 0.89       | COX6C_MOUSE | 6.33     | 0.91       |



| Protein ID  | Sham/UUO | Confidence | Protein ID  | Sham/UUO | Confidence | Protein ID  | Sham/UUO | Confidence |
|-------------|----------|------------|-------------|----------|------------|-------------|----------|------------|
| ODB2_MOUSE  | 6.31     | 0.81       | PH4H_MOUSE  | 4.83     | 0.84       | NAPSA_MOUSE | 3.32     | 0.84       |
| ARLY_MOUSE  | 6.31     | 0.91       | EC11_MOUSE  | 4.80     | 0.91       | ESTD_MOUSE  | 3.28     | 0.86       |
| PRDX5_MOUSE | 6.30     | 0.91       | HCD2_MOUSE  | 4.76     | 0.91       | APMAP_MOUSE | 3.28     | 0.84       |
| PGES2_MOUSE | 6.29     | 0.89       | IDHC_MOUSE  | 4.75     | 0.90       | GSTM5_MOUSE | 3.27     | 0.87       |
| ATP5J_MOUSE | 6.29     | 0.97       | ISCA2_MOUSE | 4.73     | 0.82       | PGK1_MOUSE  | 3.27     | 0.97       |
| KAT3_MOUSE  | 6.29     | 0.81       | MIC27_MOUSE | 4.70     | 0.81       | ISCU_MOUSE  | 3.25     | 0.81       |
| ACOX2_MOUSE | 6.24     | 0.84       | SAM50_MOUSE | 4.69     | 0.89       | VA0D1_MOUSE | 3.24     | 0.87       |
| AT5F1_MOUSE | 6.17     | 0.92       | LONM_MOUSE  | 4.66     | 0.90       | GVIN1_MOUSE | 3.22     | 0.83       |
| NU3M_MOUSE  | 6.15     | 0.95       | MIC60_MOUSE | 4.65     | 0.92       | PRPS2_MOUSE | 3.20     | 0.85       |
| CH10_MOUSE  | 6.15     | 0.90       | ATIF1_MOUSE | 4.61     | 0.83       | PGM1_MOUSE  | 3.13     | 0.90       |
| NDUB9_MOUSE | 6.10     | 0.83       | LY22_MOUSE  | 4.60     | 0.93       | PHB_MOUSE   | 3.13     | 0.92       |
| AATM_MOUSE  | 6.10     | 0.97       | OAT_MOUSE   | 4.59     | 0.86       | EZRI_MOUSE  | 3.13     | 0.96       |
| DHB8_MOUSE  | 6.07     | 0.87       | DDAH1_MOUSE | 4.57     | 0.83       | EHD1_MOUSE  | 3.05     | 0.83       |
| NDUA8_MOUSE | 6.07     | 0.91       | EFTU_MOUSE  | 4.54     | 0.95       | HINT1_MOUSE | 3.04     | 0.88       |
| CHDH_MOUSE  | 6.06     | 0.88       | CMC1_MOUSE  | 4.51     | 0.84       | SAHH_MOUSE  | 2.99     | 0.91       |
| ODPB_MOUSE  | 6.05     | 0.96       | ECHA_MOUSE  | 4.46     | 0.97       | GNP1_MOUSE  | 2.96     | 0.89       |
| VATA_MOUSE  | 6.04     | 0.92       | RT35_MOUSE  | 4.43     | 0.81       | CAH2_MOUSE  | 2.95     | 0.95       |
| MRP2_MOUSE  | 6.03     | 0.82       | THTM_MOUSE  | 4.41     | 0.83       | THIKA_MOUSE | 2.95     | 0.91       |
| ETHE1_MOUSE | 5.99     | 0.92       | XPP1_MOUSE  | 4.40     | 0.87       | HDHD2_MOUSE | 2.90     | 0.82       |
| VATH_MOUSE  | 5.94     | 0.90       | VATD_MOUSE  | 4.40     | 0.89       | TTC38_MOUSE | 2.87     | 0.87       |
| NDUC2_MOUSE | 5.93     | 0.88       | BCAT2_MOUSE | 4.38     | 0.89       | 41_MOUSE    | 2.84     | 0.85       |
| DCXR_MOUSE  | 5.92     | 0.88       | DHE3_MOUSE  | 4.37     | 0.92       | VDAC2_MOUSE | 2.84     | 0.94       |
| GSTT2_MOUSE | 5.84     | 0.87       | 4F2_MOUSE   | 4.34     | 0.91       | HEM2_MOUSE  | 2.82     | 0.91       |
| ALDH2_MOUSE | 5.82     | 0.95       | ATAD3_MOUSE | 4.30     | 0.80       | RADI_MOUSE  | 2.79     | 0.83       |
| TRAP1_MOUSE | 5.82     | 0.88       | TRXR2_MOUSE | 4.29     | 0.83       | CCS_MOUSE   | 2.75     | 0.99       |
| AL9A1_MOUSE | 5.76     | 0.94       | ACADL_MOUSE | 4.28     | 0.87       | AKCL2_MOUSE | 2.73     | 0.93       |
| ETFD_MOUSE  | 5.74     | 0.89       | CPT1A_MOUSE | 4.27     | 0.84       | GPD1L_MOUSE | 2.72     | 0.87       |
| CPT2_MOUSE  | 5.70     | 0.88       | KCRU_MOUSE  | 4.24     | 0.88       | TPIS_MOUSE  | 2.71     | 0.95       |
| ANK3_MOUSE  | 5.70     | 0.85       | AMPE_MOUSE  | 4.21     | 0.87       | UGPA_MOUSE  | 2.66     | 0.87       |
| ACOT4_MOUSE | 5.68     | 0.81       | GLRX5_MOUSE | 4.20     | 0.93       | HXK1_MOUSE  | 2.66     | 0.91       |
| MARC2_MOUSE | 5.65     | 0.89       | MAOX_MOUSE  | 4.20     | 0.83       | FIS1_MOUSE  | 2.65     | 0.89       |
| ACOT1_MOUSE | 5.63     | 0.85       | M2OM_MOUSE  | 4.19     | 0.83       | GLGB_MOUSE  | 2.59     | 0.98       |
| DOPD_MOUSE  | 5.63     | 0.91       | CLIC5_MOUSE | 4.18     | 0.85       | GTR1_MOUSE  | 2.58     | 0.80       |
| TIM13_MOUSE | 5.58     | 0.96       | ACDSB_MOUSE | 4.10     | 0.93       | NAMPT_MOUSE | 2.57     | 0.82       |
| ODPA_MOUSE  | 5.58     | 0.92       | BASI_MOUSE  | 4.09     | 0.87       | FUCM_MOUSE  | 2.52     | 0.88       |
| MPCP_MOUSE  | 5.57     | 0.90       | SCRN2_MOUSE | 4.05     | 0.82       | ENOA_MOUSE  | 2.51     | 0.98       |
| ABHEB_MOUSE | 5.57     | 0.93       | TMM65_MOUSE | 4.03     | 0.88       | SYPL1_MOUSE | 2.50     | 0.91       |
| GRP75_MOUSE | 5.56     | 0.82       | TIM10_MOUSE | 4.01     | 0.86       | S10A1_MOUSE | 2.44     | 0.85       |
| HIBCH_MOUSE | 5.55     | 0.89       | MTCH2_MOUSE | 4.01     | 0.89       | PDXK_MOUSE  | 2.42     | 0.85       |
| NDUBB_MOUSE | 5.53     | 0.90       | PROSC_MOUSE | 4.01     | 0.90       | PARK7_MOUSE | 2.42     | 0.93       |
| MIC19_MOUSE | 5.53     | 0.90       | LDHB_MOUSE  | 3.99     | 0.86       | PGAM1_MOUSE | 2.41     | 0.97       |
| VATB2_MOUSE | 5.52     | 0.85       | MOT1_MOUSE  | 3.98     | 0.91       | GMPR1_MOUSE | 2.41     | 0.81       |
| GSH1_MOUSE  | 5.49     | 0.86       | MAVS_MOUSE  | 3.95     | 0.84       | GSTM1_MOUSE | 2.37     | 0.89       |
| NCEH1_MOUSE | 5.47     | 0.92       | T126A_MOUSE | 3.93     | 0.85       | EHD3_MOUSE  | 2.37     | 0.86       |
| ECH1_MOUSE  | 5.46     | 0.97       | GLNA_MOUSE  | 3.91     | 0.83       | GSHR_MOUSE  | 2.33     | 0.80       |
| VATF_MOUSE  | 5.45     | 0.90       | CYB5_MOUSE  | 3.87     | 0.86       | G3P_MOUSE   | 2.29     | 0.92       |
| VATG3_MOUSE | 5.43     | 0.94       | AT11A_MOUSE | 3.85     | 0.81       | TMM33_MOUSE | 2.28     | 0.86       |
| CN159_MOUSE | 5.41     | 0.83       | CISY_MOUSE  | 3.83     | 0.88       | TIM44_MOUSE | 2.25     | 0.83       |
| DECR_MOUSE  | 5.39     | 0.89       | AMPN_MOUSE  | 3.83     | 0.95       | ARL1_MOUSE  | 2.24     | 0.90       |
| CMBL_MOUSE  | 5.38     | 0.85       | ADT1_MOUSE  | 3.82     | 0.83       | PRDX6_MOUSE | 2.23     | 0.94       |
| ACADS_MOUSE | 5.36     | 0.89       | EM55_MOUSE  | 3.82     | 0.91       | NDKB_MOUSE  | 2.11     | 0.95       |
| SUCB1_MOUSE | 5.33     | 0.97       | PTGR2_MOUSE | 3.79     | 0.89       | ADK_MOUSE   | 2.03     | 0.87       |
| VATE1_MOUSE | 5.32     | 0.91       | NPL_MOUSE   | 3.76     | 0.88       | PRDX1_MOUSE | 2.03     | 0.91       |
| LPPRC_MOUSE | 5.26     | 0.88       | PHB2_MOUSE  | 3.73     | 0.94       | G6PI_MOUSE  | 2.03     | 0.93       |
| ODP2_MOUSE  | 5.25     | 0.98       | MIF_MOUSE   | 3.71     | 0.92       | RS24_MOUSE  | 1.99     | 0.88       |
| PRDX3_MOUSE | 5.23     | 0.90       | EBP_MOUSE   | 3.70     | 0.91       | NDKA_MOUSE  | 1.98     | 0.88       |
| KAD2_MOUSE  | 5.21     | 0.86       | AATC_MOUSE  | 3.68     | 0.88       | AP1B1_MOUSE | 1.97     | 0.82       |
| SQRD_MOUSE  | 5.20     | 0.92       | DHI2_MOUSE  | 3.67     | 0.83       | PACN2_MOUSE | 1.96     | 0.85       |
| GSHB_MOUSE  | 5.17     | 0.82       | TSPO_MOUSE  | 3.66     | 0.98       | MAT2B_MOUSE | 1.94     | 0.89       |
| LYPA1_MOUSE | 5.13     | 0.90       | NCPR_MOUSE  | 3.64     | 0.81       | PEBP1_MOUSE | 1.92     | 0.92       |
| ACADV_MOUSE | 5.12     | 0.89       | CYB5B_MOUSE | 3.62     | 0.93       | SPTN1_MOUSE | 1.85     | 0.88       |
| KAD3_MOUSE  | 5.10     | 0.89       | THIC_MOUSE  | 3.61     | 0.85       | TMED4_MOUSE | 1.84     | 0.90       |
| DHPR_MOUSE  | 5.07     | 0.88       | GSTA4_MOUSE | 3.61     | 0.86       | SPTB2_MOUSE | 1.80     | 0.87       |
| NIT1_MOUSE  | 5.03     | 0.90       | RM04_MOUSE  | 3.59     | 0.91       | UGDH_MOUSE  | 1.79     | 0.82       |
| ODO1_MOUSE  | 5.00     | 0.91       | AMPL_MOUSE  | 3.57     | 0.93       | GSTP1_MOUSE | 1.77     | 0.94       |
| E41L3_MOUSE | 4.96     | 0.86       | VATC1_MOUSE | 3.55     | 0.83       | UAP1L_MOUSE | 1.76     | 0.84       |
| SAP3_MOUSE  | 4.96     | 0.85       | GGCT_MOUSE  | 3.55     | 0.99       | SNX3_MOUSE  | 1.72     | 0.84       |
| MDHC_MOUSE  | 4.94     | 0.95       | C1QBP_MOUSE | 3.52     | 0.83       | TBB4B_MOUSE | 1.71     | 0.90       |
| SPS2_MOUSE  | 4.93     | 0.90       | ACBP_MOUSE  | 3.51     | 0.93       | GALK1_MOUSE | 1.64     | 0.85       |
| THIOM_MOUSE | 4.90     | 0.90       | EFTS_MOUSE  | 3.50     | 0.85       | ALDOA_MOUSE | 1.57     | 0.84       |
| RM12_MOUSE  | 4.89     | 0.91       | TXTP_MOUSE  | 3.47     | 0.87       | GPX3_MOUSE  | 1.54     | 0.83       |
| NIT2_MOUSE  | 4.88     | 0.90       | SPRE_MOUSE  | 3.47     | 0.96       | HS90A_MOUSE | 1.50     | 0.81       |
| IDH3A_MOUSE | 4.86     | 0.91       | GPX1_MOUSE  | 3.45     | 0.92       | CLH1_MOUSE  | 1.47     | 0.88       |
| NDUA6_MOUSE | 4.86     | 0.84       | F213A_MOUSE | 3.42     | 0.89       |             |          |            |
| VDAC1_MOUSE | 4.85     | 0.96       | DHB4_MOUSE  | 3.39     | 0.95       |             |          |            |
| HYES_MOUSE  | 4.85     | 0.81       | ECHB_MOUSE  | 3.37     | 0.87       |             |          |            |
| ACOC_MOUSE  | 4.84     | 0.94       | SODC_MOUSE  | 3.33     | 0.94       |             |          |            |

# New Supplementary Table 4

A

| SIGNIFICANTLY ENRICHED PROTEIN CLASSES (PANTHER)  | UUO/Sham > 1 |         | UUO/Sham < 1 |         |       |          |
|---------------------------------------------------|--------------|---------|--------------|---------|-------|----------|
|                                                   | Fold change  | p-value | Fold change  | p-value |       |          |
| cytoskeletal protein (PC00085)                    | +            | 7.82    | 1.99E-28     | -       | 0.82  | 1.00E+00 |
| actin family cytoskeletal protein (PC00041)       | +            | 11.33   | 2.49E-25     | -       | 0.89  | 1.00E+00 |
| extracellular matrix protein (PC00102)            | +            | 6.76    | 1.92E-09     | -       | 0.4   | 1.00E+00 |
| non-motor actin binding protein (PC00165)         | +            | 9.05    | 4.09E-08     | -       | 1     | 1.00E+00 |
| intermediate filament (PC00129)                   | +            | 14.19   | 7.22E-07     | -       | < 0.2 | 1.00E+00 |
| extracellular matrix structural protein (PC00103) | +            | 14.87   | 2.99E-06     | -       | < 0.2 | 1.00E+00 |
| serine protease inhibitor (PC00204)               | +            | 8.79    | 1.52E-05     | -       | < 0.2 | 1.00E+00 |
| mRNA splicing factor (PC00148)                    | +            | 9.89    | 2.06E-05     | -       | < 0.2 | 1.00E+00 |
| mRNA processing factor (PC00147)                  | +            | 7.99    | 3.86E-05     | -       | < 0.2 | 1.00E+00 |
| surfactant (PC00212)                              | +            | 15.36   | 1.01E-04     | -       | < 0.2 | 1.00E+00 |
| structural protein (PC00211)                      | +            | 7.31    | 3.11E-04     | -       | < 0.2 | 1.00E+00 |
| extracellular matrix linker protein (PC00101)     | +            | 23.2    | 6.28E-04     | -       | < 0.2 | 1.00E+00 |
| actin and actin related protein (PC00039)         | +            | 20.8    | 1.06E-03     | -       | < 0.2 | 1.00E+00 |
| protease inhibitor (PC00191)                      | +            | 4.7     | 2.51E-03     | -       | < 0.2 | 4.04E-01 |
| enzyme modulator (PC00095)                        | +            | 2.22    | 2.48E-02     | -       | 0.39  | 2.52E-02 |
| actin binding motor protein (PC00040)             | +            | 10.22   | 3.03E-02     | -       | < 0.2 | 1.00E+00 |
| antibacterial response protein (PC00051)          | +            | 5.95    | 4.21E-02     | -       | < 0.2 | 1.00E+00 |
| transferase (PC00220)                             | -            | < 0.2   | 4.95E-02     | +       | 2.67  | 4.96E-11 |
| nucleotide kinase (PC00172)                       | -            | < 0.2   | 1.00E+00     | +       | 6.23  | 3.35E-02 |
| transaminase (PC00216)                            | -            | < 0.2   | 1.00E+00     | +       | 10.38 | 2.91E-02 |
| G-protein coupled receptor (PC00021)              | -            | < 0.2   | 1.00E+00     | -       | < 0.2 | 1.39E-02 |
| transporter (PC00227)                             | +            | 1.15    | 1.00E+00     | +       | 1.93  | 4.81E-03 |
| nucleic acid binding (PC00171)                    | +            | 1.03    | 1.00E+00     | -       | 0.47  | 3.34E-03 |
| peroxidase (PC00180)                              | -            | < 0.2   | 1.00E+00     | +       | 11.96 | 2.87E-03 |
| transfer/carrier protein (PC00219)                | +            | 1.41    | 1.00E+00     | +       | 2.79  | 1.92E-03 |
| anion channel (PC00049)                           | -            | < 0.2   | 1.00E+00     | +       | 14.23 | 1.08E-03 |
| carbohydrate kinase (PC00065)                     | -            | < 0.2   | 1.00E+00     | +       | 11.25 | 8.17E-04 |
| hydrolase (PC00121)                               | -            | 0.77    | 1.00E+00     | +       | 1.91  | 2.85E-04 |
| ligase (PC00142)                                  | -            | 0.31    | 1.00E+00     | +       | 3.18  | 1.29E-04 |
| receptor (PC00197)                                | +            | 1.43    | 1.00E+00     | -       | 0.28  | 4.20E-05 |
| mitochondrial carrier protein (PC00158)           | -            | < 0.2   | 1.00E+00     | +       | 9.61  | 7.16E-06 |
| cation transporter (PC00068)                      | -            | < 0.2   | 1.00E+00     | +       | 4.87  | 1.06E-06 |
| acyltransferase (PC00042)                         | +            | 1.28    | 1.00E+00     | +       | 7.95  | 3.05E-07 |
| epimerase/racemase (PC00096)                      | -            | < 0.2   | 1.00E+00     | +       | 12.03 | 5.59E-09 |
| transcription factor (PC00218)                    | -            | 0.55    | 1.00E+00     | -       | < 0.2 | 2.07E-09 |
| acetyltransferase (PC00038)                       | -            | < 0.2   | 1.00E+00     | +       | 9.41  | 1.90E-09 |
| ATP synthase (PC00002)                            | -            | < 0.2   | 1.00E+00     | +       | 15.06 | 1.86E-09 |
| isomerase (PC00135)                               | -            | < 0.2   | 1.00E+00     | +       | 6.99  | 5.53E-11 |
| hydratase (PC00120)                               | -            | < 0.2   | 1.00E+00     | +       | 35.17 | 6.73E-13 |
| lyase (PC00144)                                   | -            | < 0.2   | 1.00E+00     | +       | 8.25  | 1.26E-13 |
| oxidase (PC00175)                                 | -            | 0.83    | 1.00E+00     | +       | 9.28  | 2.02E-15 |
| reductase (PC00198)                               | -            | 0.6     | 1.00E+00     | +       | 10.61 | 1.60E-27 |
| dehydrogenase (PC00092)                           | -            | 0.91    | 1.00E+00     | +       | 16.29 | 3.41E-73 |
| oxidoreductase (PC00176)                          | -            | 0.56    | 1.00E+00     | +       | 10.38 | 1.77E-91 |

B

| KEGG PATHWAYS SIGNIFICANTLY ENRICHED IN UUO KIDNEYS | Fold Change | p-value  |
|-----------------------------------------------------|-------------|----------|
| mmu04510:Focal adhesion                             | 6.36        | 1.29E-09 |
| mmu04810:Regulation of actin cytoskeleton           | 5.48        | 3.82E-08 |
| mmu04512:ECM-receptor interaction                   | 9.27        | 1.89E-07 |
| mmu04610:Complement and coagulation cascades        | 8.40        | 8.72E-06 |
| mmu03040:Spliceosome                                | 5.64        | 5.41E-05 |
| mmu05414:Dilated cardiomyopathy                     | 5.32        | 1.78E-03 |
| mmu04530:Tight junction                             | 4.15        | 2.79E-03 |
| mmu04670:Leukocyte transendothelial migration       | 4.12        | 6.42E-03 |
| mmu05222:Small cell lung cancer                     | 4.94        | 6.72E-03 |
| mmu05416:Viral myocarditis                          | 4.47        | 1.02E-02 |
| mmu04666:Fc gamma R-mediated phagocytosis           | 4.28        | 1.21E-02 |
| mmu05322:Systemic lupus erythematosus               | 4.08        | 1.48E-02 |
| mmu04270:Vascular smooth muscle contraction         | 3.50        | 2.67E-02 |
| mmu05410:Hypertrophic cardiomyopathy (HCM)          | 4.17        | 3.03E-02 |
