# Supplementary material
Source: PubMed Central journal article supplement (PMC5827594)

# Supplementary Movie 1

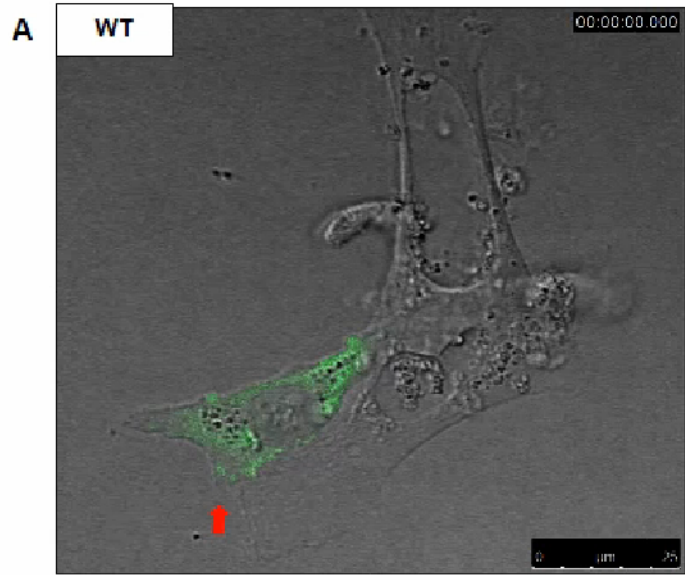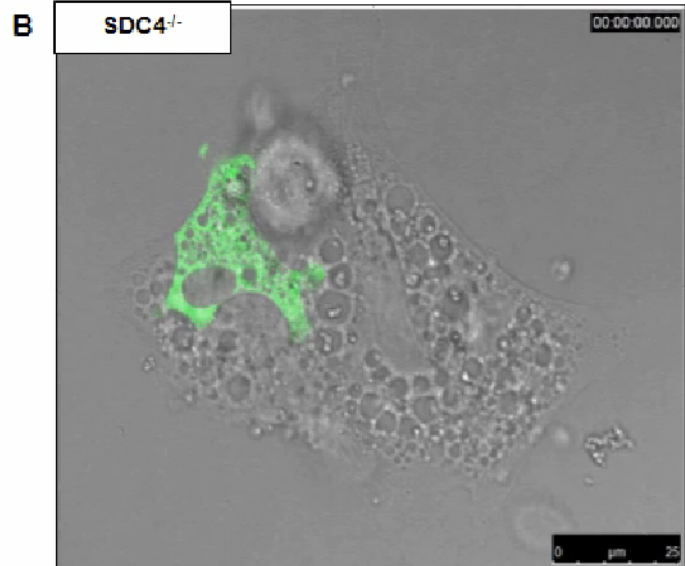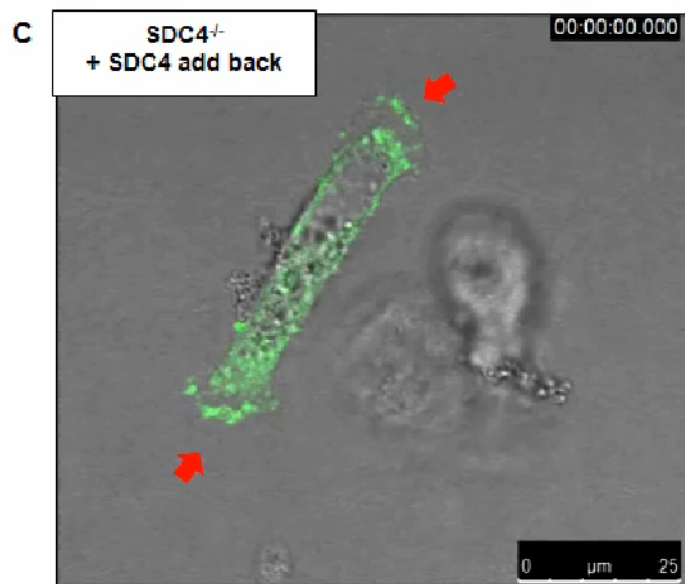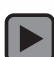

Supplement: ASN.2017050479SupplementaryData1.pdf [file ASN.2017050479SupplementaryData1.pdf]
